# Supplementary material for: Effect of “magic chlorine” in drug discovery: an in silico approach
Source: Royal Society of Chemistry journal article supplement (doi:10.1039/d3ra06638j), 2023-01-01
Supplement: d3ra06638j1.pdf [file d3ra06638j1.pdf]

## Supplementary Information

**Title:** Effect of “Magic Chloro” in drug discovery: An *in silico* Approach

**Submitted by:** Sravani Joshi, Ruby Srivastava\*

CSIR-Centre for Cellular and Molecular Biology,

Hyderabad.

### Formulas Used

The ionization potential (IP) and electron affinity (EA) values were calculated by:

$$\text{IP (I)} = E(\text{N}-1) - E(\text{N})$$

$$\text{EA (A)} = E(\text{N}) - E(\text{N}+1),$$

Where  $E(\text{N})$ =energy of complex and  $E(\text{N}-1)$  and  $E(\text{N}+1)$  are the cationic and anionic energies.

The HOMO-LUMO Gap

$$\Delta E = E_{\text{LUMO}} - E_{\text{HOMO}}$$

where  $E_{\text{HOMO}}$  is the energy of the highest occupied molecular orbital and  $E_{\text{LUMO}}$  is the energy of the lowest unoccupied molecular orbital.

The chemical descriptors are calculated using CDFT.<sup>1</sup>

The chemical potential  $\mu_p$  is defined as:

$$\mu_p = (\partial E / \partial N)_{v(r)} = -\chi$$

where  $\mu_p$  is the chemical potential,  $E$  is the total energy,  $N$  is the number of electrons,  $v(r)$  is the external potential of the system and  $\chi$  is the global electronegativity.

The global hardness is given by:

$$\eta = (\partial^2 E / \partial N^2)_{(r)}$$

Using the finite difference approximation and the Koopmans theorem, the global electronegativity ( $\chi$ ) and the global hardness ( $\eta$ ) are given by:

$$\chi = (I+A)/2 \approx -(E_{\text{HOMO}}+E_{\text{LUMO}})/2$$

$$\eta = (I-A)/2 \approx (E_{\text{LUMO}}-E_{\text{HOMO}})/2 \text{ respectively.}$$

The global softness which is the reciprocal of the global hardness can be obtained by:

$$S = 1/\eta$$

The electrophilicity index ( $\omega$ ) is defined as:

$$\omega = \mu_p^2/2\eta$$

$$\text{Electrodonating Power as } \omega^- \approx (3\varepsilon_{\text{H}} + \varepsilon_{\text{L}})^2/16\eta \approx -\frac{1}{4}(3I + A)$$

$$\text{Electroaccepting Power as } \omega^+ \approx (\varepsilon_{\text{H}} + 3\varepsilon_{\text{L}})^2/16\eta \approx -\frac{1}{4}(I + 3A)$$

while the Net Electrophilicity is  $\Delta\omega_{\pm} = \omega^+ + \omega^-$ , being  $\varepsilon_{\text{H}}$  and  $\varepsilon_{\text{L}}$  the frontier orbital energies related to the studied antagonists considered in this research.<sup>2</sup>

**References:**

- (1) Ángel Ulises Orozco-Valencia and Alberto Vela, The Electrodonating and Electroaccepting Powers in Atoms, *J. Mex. Chem. Soc.* 2012, 56(3), 294-301.
- (2) Chattaraj PK, Chakraborty A, Giri S. Net electrophilicity. *J Phys Chem A.* 2009 113(37):10068-74.

| Complexes | cLopP | MW     | TPSA   | HBD | HBA | nrotb |
|-----------|-------|--------|--------|-----|-----|-------|
|           | ≤5    | <500   |        | <5  | <10 |       |
| Ref 1     | 2.68  | 284.74 | 32.67  | 0   | 2   | 1     |
| Ref 2     | 0.95  | 323.13 | 115.38 | 3   | 5   | 7     |
| Ref 3     | 3.95  | 319.87 | 28.16  | 1   | 2   | 8     |
| Ref 4     | 2.66  | 358.26 | 58.36  | 1   | 3   | 9     |
| 1a        | 3.15  | 425.43 | 167.66 | 5   | 11  | 7     |
| 1b        | 3.83  | 459.88 | 167.66 | 5   | 11  | 7     |
| 2a        | 1.05  | 323.35 | 72.73  | 1   | 5   | 5     |
| 2b        | 1.70  | 357.79 | 72.73  | 1   | 5   | 5     |
| 3-1a      | 0.97  | 284.33 | 91.28  | 2   | 3   | 3     |
| 3-1b      | 3.84  | 318.79 | 65.98  | 2   | 4   | 3     |
| 3-2a      | 3.25  | 298.37 | 55.12  | 1   | 4   | 3     |
| 3-2b      | 3.91  | 332.81 | 55.12  | 1   | 4   | 3     |
| 3-3a      | 3.52  | 364.43 | 72.95  | 1   | 6   | 4     |
| 3-3b      | 4.18  | 398.88 | 72.95  | 1   | 6   | 4     |
| 3-4a      | 4.50  | 363.44 | 60.06  | 1   | 5   | 4     |
| 3-4b      | 5.16  | 397.89 | 60.06  | 1   | 5   | 4     |
| 4a        | 3.79  | 317.73 | 97.37  | 5   | 6   | 3     |
| 4b        | 3.79  | 317.73 | 97.37  | 5   | 6   | 3     |
| 4c        | 4.44  | 352.18 | 97.37  | 5   | 6   | 3     |
| 5a        | 4.00  | 428.57 | 52.57  | 2   | 3   | 9     |
| 5b        | 4.69  | 463.01 | 52.57  | 2   | 3   | 9     |
| 6a        | 1.52  | 195.24 | 43.69  | 2   | 3   | 1     |
| 6b        | 2.10  | 229.69 | 43.69  | 2   | 3   | 1     |
| 7a        | 1.89  | 444.49 | 117.61 | 4   | 6   | 5     |
| 7b        | 2.35  | 513.38 | 117.61 | 4   | 6   | 5     |
| 8a        | 4.33  | 291.35 | 42.35  | 1   | 3   | 4     |
| 8b        | 5.87  | 360.24 | 42.35  | 1   | 3   | 4     |
| 9a        | 1.28  | 248.33 | 41.57  | 1   | 4   | 5     |
| 9b        | 1.96  | 282.77 | 41.57  | 1   | 4   | 5     |
| 9c        | 2.56  | 317.22 | 41.57  | 1   | 4   | 5     |
| 10a       | 2.16  | 247.68 | 49.33  | 2   | 2   | 3     |
| 10b       | 2.16  | 247.68 | 49.33  | 2   | 2   | 3     |
| 10c       | 5.25  | 316.57 | 49.33  | 2   | 3   | 2     |
| 11a       | 2.55  | 254.33 | 34.15  | 1   | 3   | 3     |
| 11b       | 3.18  | 288.78 | 34.15  | 1   | 3   | 3     |
| 11c       | 3.18  | 323.22 | 34.15  | 1   | 3   | 3     |
| 12a       | 3.41  | 388.38 | 122.64 | 5   | 7   | 4     |
| 12b       | 4.07  | 422.82 | 122.64 | 5   | 7   | 4     |
| 12c       | 4.75  | 457.27 | 122.64 | 5   | 7   | 4     |

**Supplementary Table 1:** CLP-clog P, MW-Molecular Weight (g/mol), TPSA-Topological Polar Surface Area ( $\text{\AA}^2$ ), HBD-Number of Hydrogen Bond Donors, HBA-Number of Hydrogen Bond Acceptors, and nrotb- Number of Rotatable Bonds for the reference drugs Ref (1-4) and studied 12 inhibitors. These physicochemical parameters are taken by Molinspiration Chemoinformatics software.

| Complexes | DL    | DS   | S     | MUT | TUM | IRR | REP |
|-----------|-------|------|-------|-----|-----|-----|-----|
| Ref 1     | 5.98  | 0.15 | -4.67 | ✓   | ✓   | ✓   | ✓   |
| Ref 2     | -4.61 | 0.06 | -2.37 | ✓   | ✓   | ✓   | ✓   |
| Ref 3     | 7.39  | 0.25 | -4.06 | ✓   | ✓   | ✓   | ✓   |
| Ref 4     | -1.23 | 0.11 | -2.73 | ✓   | ✓   | ✓   | ✓   |
| 1a        | -1.65 | 0.23 | -4.69 | ✓   | ✓   | ✓   | ✓   |
| 1b        | 0.16  | 0.33 | -5.43 | ✓   | ✓   | ✓   | ✓   |
| 2a        | -4.26 | 0.36 | -4.26 | ✓   | ✓   | ✓   | ✓   |
| 2b        | -4.29 | 0.3  | -5.0  | ✓   | ✓   | ✓   | ✓   |
| 3-1a      | 2.48  | 0.82 | -3.3  | ✓   | ✓   | ✓   | ✓   |
| 3-1b      | 2.90  | 0.74 | -4.04 | ✓   | ✓   | ✓   | ✓   |
| 3-2a      | 3.90  | 0.85 | -2.96 | ✓   | ✓   | ✓   | ✓   |
| 3-2b      | 4.28  | 0.77 | -3.7  | ✓   | ✓   | ✓   | ✓   |
| 3-3a      | 5.2   | 0.67 | -4.47 | ✓   | ✓   | ✓   | ✓   |
| 3-3b      | 5.55  | 0.54 | -5.21 | ✓   | ✓   | ✓   | ✓   |
| 3-4a      | 2.19  | 0.49 | -5.48 | ✓   | ✓   | ✓   | ✓   |
| 3-4b      | 2.53  | 0.39 | -6.22 | ✓   | ✓   | ✓   | ✓   |
| 4a        | 4.35  | 0.74 | -3.93 | ✓   | ✓   | ✓   | ✓   |
| 4b        | 4.35  | 0.74 | -3.93 | ✓   | ✓   | ✓   | ✓   |
| 4c        | 4.3   | 0.62 | -4.67 | ✓   | ✓   | ✓   | ✓   |
| 5a        | 3.75  | 0.42 | -5.66 | ✓   | ✓   | ✓   | ✓   |
| 5b        | 4.89  | 0.32 | -6.4  | ✓   | ✓   | ✓   | ✓   |
| 6a        | 0.84  | 0.38 | -4.85 | ✓   | ✓   | ✓   | ✓   |
| 6b        | 1.29  | 0.52 | -5.14 | ✓   | ✓   | ✓   | ✓   |
| 7a        | 6.79  | 0.54 | -4.57 | ✓   | ✓   | ✓   | ✓   |
| 7b        | 9.02  | 0.15 | -6.04 | ✓   | ✓   | ✓   | ✓   |
| 8a        | -2.72 | 0.35 | -4.5  | ✓   | ✓   | ✓   | ✓   |
| 8b        | -1.35 | 0.05 | -5.98 | ✓   | ✓   | ✓   | ✓   |
| 9a        | 3.32  | 0.94 | -1.38 | ✓   | ✓   | ✓   | ✓   |
| 9b        | 5.18  | 0.92 | -2.12 | ✓   | ✓   | ✓   | ✓   |
| 9c        | 3.57  | 0.86 | -2.85 | ✓   | ✓   | ✓   | ✓   |
| 10a       | 1.18  | 0.73 | -3.57 | ✓   | ✓   | ✓   | ✓   |
| 10b       | 1.18  | 0.73 | -3.57 | ✓   | ✓   | ✓   | ✓   |
| 10c       | 1.64  | 0.54 | -5.04 | ✓   | ✓   | ✓   | ✓   |
| 11a       | 0.45  | 0.6  | -4.39 | ✓   | ✓   | ✓   | ✓   |
| 11b       | 0.92  | 0.43 | -5.12 | ✓   | ✓   | ✓   | ✓   |
| 11c       | 1.09  | 0.16 | -5.86 | ✓   | ✓   | ✓   | ✓   |
| 12a       | 5.0   | 0.64 | -4.89 | ✓   | ✓   | ✓   | ✓   |
| 12b       | 5.35  | 0.54 | -5.52 | ✓   | ✓   | ✓   | ✓   |
| 12c       | 7.27  | 0.41 | -6.36 | ✓   | ✓   | ✓   | ✓   |

**Supplementary Table 2:** Estimated physicochemical parameters as Druglikeness (DL), Drug Score (DS), Solubility (S) and Toxicity effects (Mutagenicity (MUT), Tumorigenicity (TUM), Irritant Effect (IRR), and Reproductive effect (REP)) for the reference drugs Ref (1-4) and studied 12 inhibitors. Osiris property explorer is used to estimate these properties. The color of tick indicates safe usage (green); mild toxicity (yellow) and high toxicity (red).

| Complexes | arrhythmia | Cardiac failure | Heart block | herG Toxicity | hypertension | Myocardial Infarction |
|-----------|------------|-----------------|-------------|---------------|--------------|-----------------------|
| Ref 1     | toxic      | safe            | toxic       | safe          | safe         | toxic                 |
| Ref 2     | safe       | toxic           | safe        | safe          | safe         | safe                  |
| Ref 3     | toxic      | toxic           | toxic       | toxic         | toxic        | toxic                 |
| Ref 4     | toxic      | safe            | safe        | toxic         | toxic        | toxic                 |
| 1a        | safe       | safe            | safe        | safe          | safe         | safe                  |
| 1b        | safe       | safe            | safe        | safe          | safe         | safe                  |
| 2a        | safe       | safe            | safe        | safe          | toxic        | safe                  |
| 2b        | safe       | safe            | safe        | safe          | toxic        | safe                  |
| 3-1a      | safe       | safe            | safe        | safe          | safe         | safe                  |
| 3-1b      | safe       | safe            | safe        | safe          | toxic        | safe                  |
| 3-2a      | safe       | safe            | safe        | safe          | toxic        | safe                  |
| 3-2b      | safe       | safe            | safe        | safe          | toxic        | safe                  |
| 3-3a      | safe       | safe            | safe        | safe          | safe         | safe                  |
| 3-3b      | safe       | safe            | safe        | safe          | safe         | safe                  |
| 3-4a      | safe       | safe            | safe        | safe          | safe         | safe                  |
| 3-4b      | safe       | safe            | safe        | toxic         | safe         | safe                  |
| 4a        | safe       | safe            | safe        | toxic         | safe         | safe                  |
| 4b        | safe       | safe            | safe        | toxic         | safe         | safe                  |
| 4c        | safe       | safe            | safe        | safe          | toxic        | safe                  |
| 5a        | safe       | safe            | safe        | toxic         | safe         | safe                  |
| 5b        | safe       | safe            | safe        | safe          | toxic        | toxic                 |
| 6a        | toxic      | safe            | safe        | safe          | safe         | toxic                 |
| 6b        | toxic      | safe            | toxic       | safe          | safe         | safe                  |
| 7a        | toxic      | safe            | toxic       | safe          | safe         | safe                  |
| 7b        | toxic      | safe            | toxic       | safe          | safe         | safe                  |

|     |       |       |       |       |       |       |
|-----|-------|-------|-------|-------|-------|-------|
| 8a  | safe  | safe  | safe  | safe  | safe  | toxic |
| 8b  | safe  | safe  | safe  | safe  | toxic | safe  |
| 9a  | toxic | safe  | toxic | safe  | safe  | toxic |
| 9b  | toxic | toxic | safe  | toxic | toxic | toxic |
| 9c  | toxic | safe  | toxic | safe  | toxic | toxic |
| 10a | safe  | safe  | safe  | safe  | safe  | safe  |
| 10b | safe  | safe  | safe  | safe  | safe  | safe  |
| 10c | safe  | safe  | safe  | safe  | safe  | safe  |
| 11a | safe  | safe  | safe  | safe  | safe  | toxic |
| 11b | safe  | safe  | safe  | safe  | safe  | toxic |
| 11c | safe  | safe  | safe  | toxic | safe  | toxic |
| 12a | safe  | safe  | safe  | safe  | safe  | toxic |
| 12b | safe  | safe  | safe  | safe  | safe  | safe  |
| 12c | safe  | safe  | safe  | safe  | safe  | safe  |
|     |       |       |       |       |       |       |

**Supplementary Table 3:** *cardioToxCSM* web server is used to evaluate the cardiac toxicity outcomes (Arrhythmia, Cardiac Failure, Heart Block, hERG toxicity, Hypertension, and Myocardial Infarction) for the reference drugs Ref (1-4) and studied 12 inhibitors.

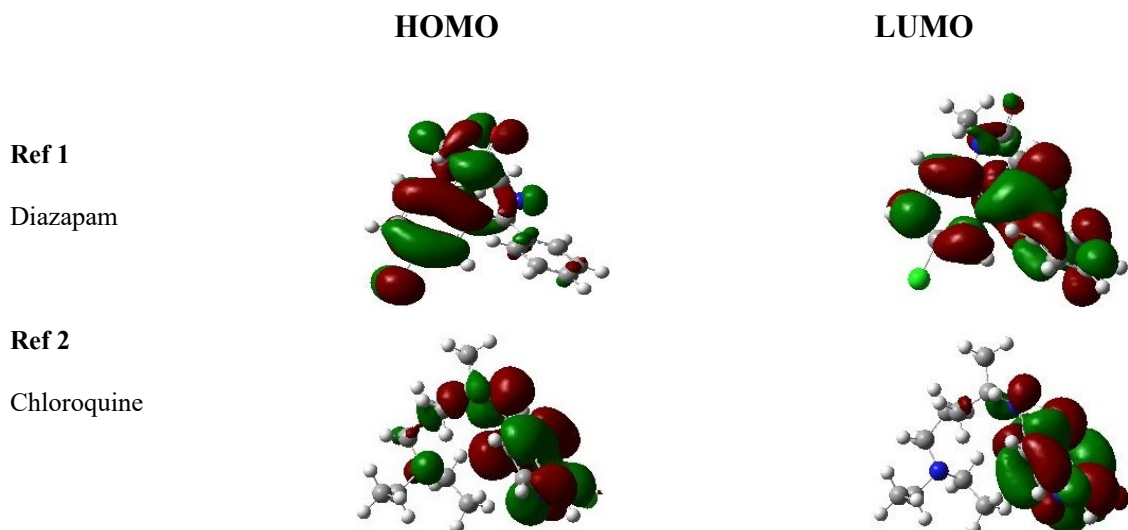

Ref 3

Chlororamphinicol

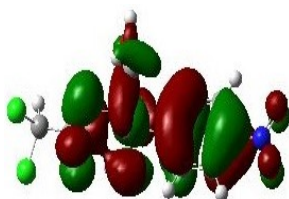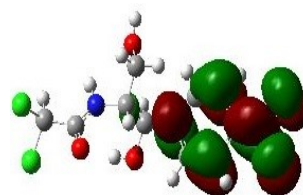

Ref 4

Bendamustine

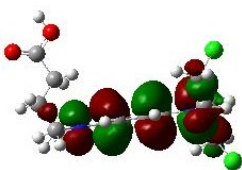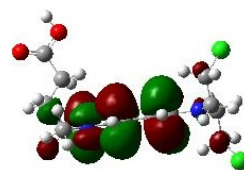

1a

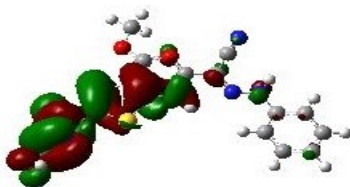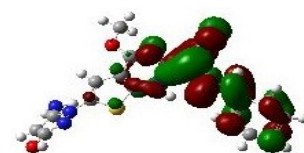

1b

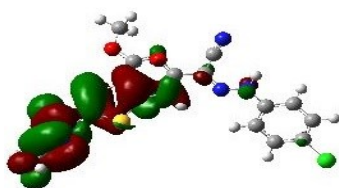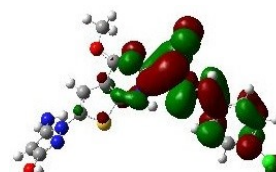

2a

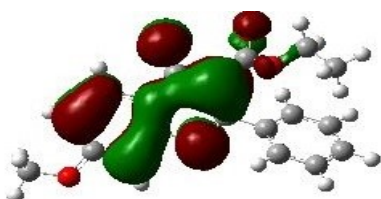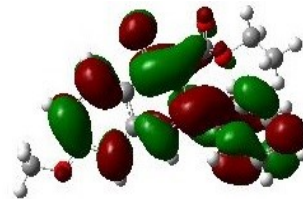

2b

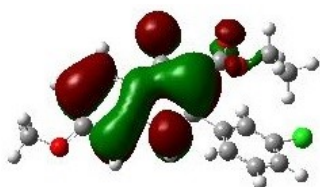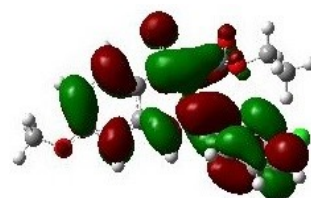

3-1a

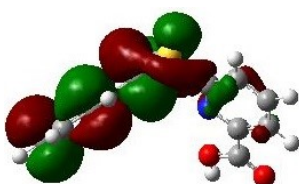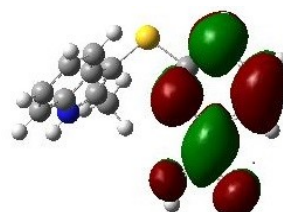





4a

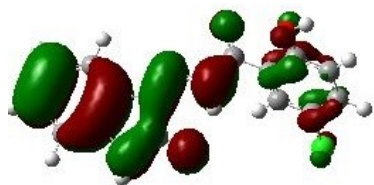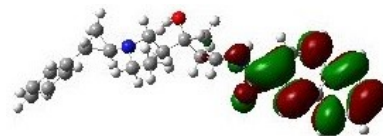

4b

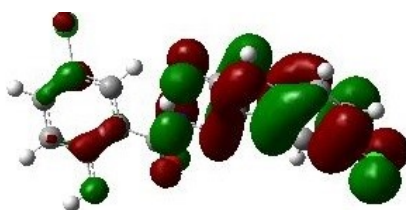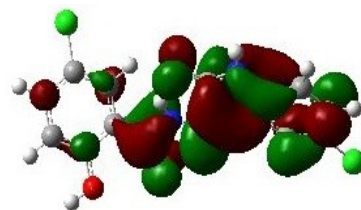

4c

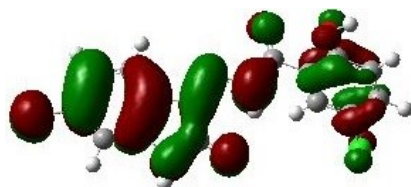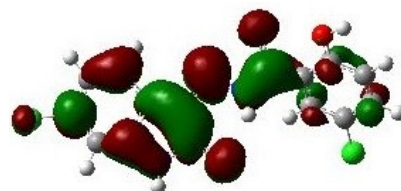

5a

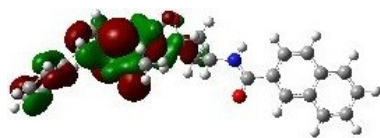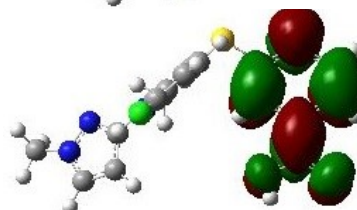

5b

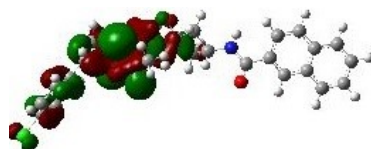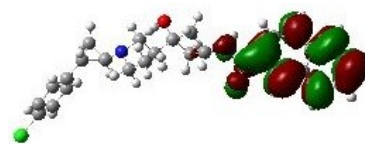

6a

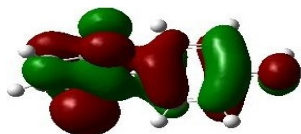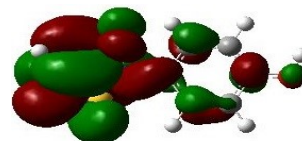

6b

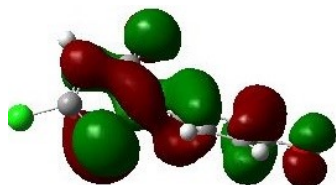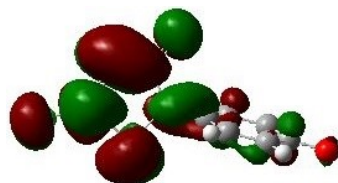

7a

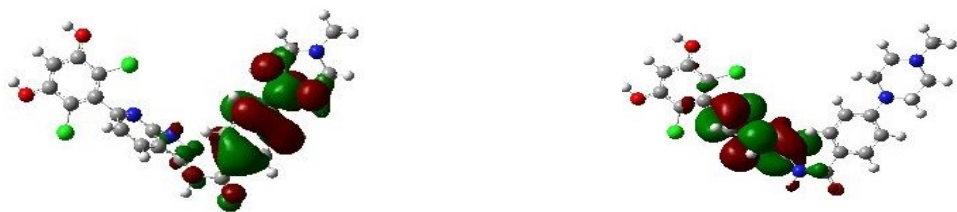

7b

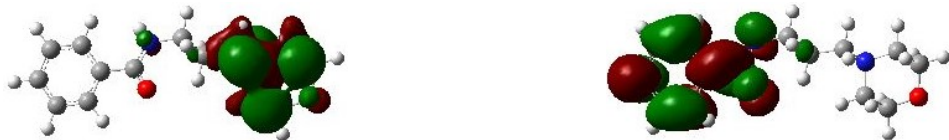

8a

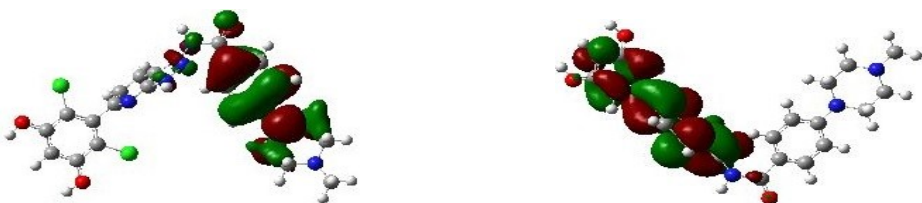

8b

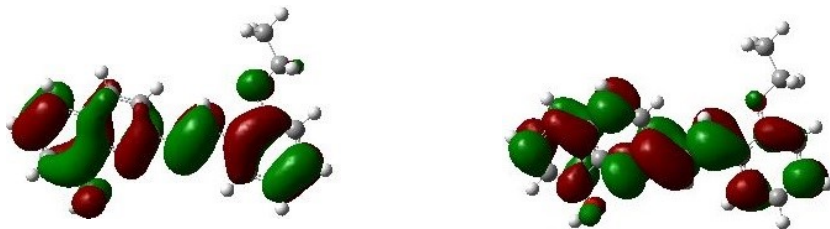

9a

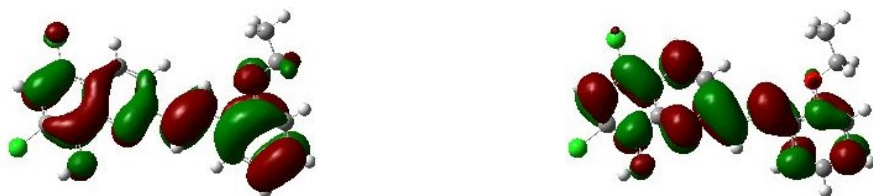

9b

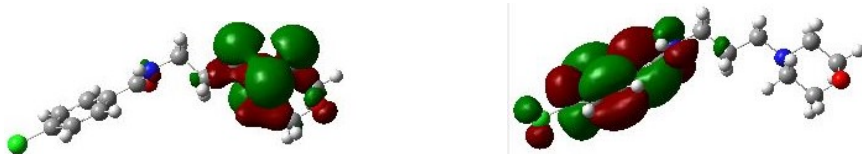

9c

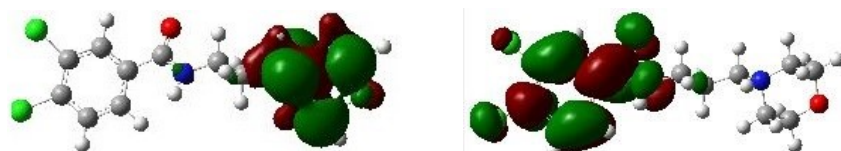

10a

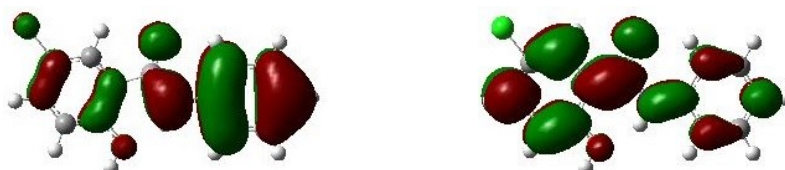

10b

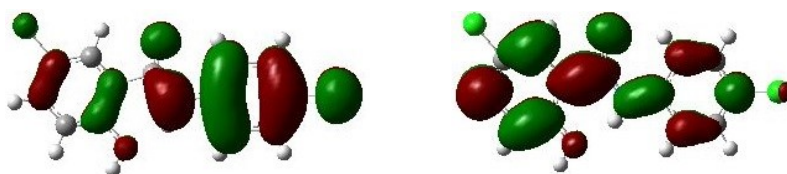

10c

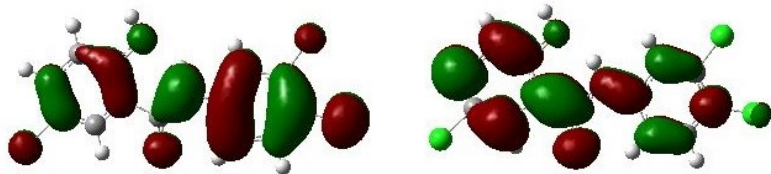

11a

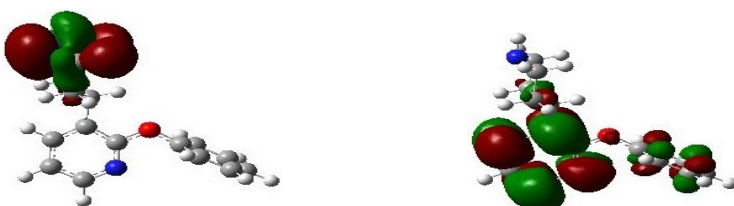

11b

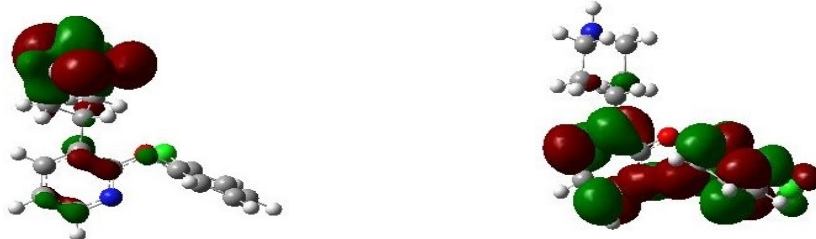

11c

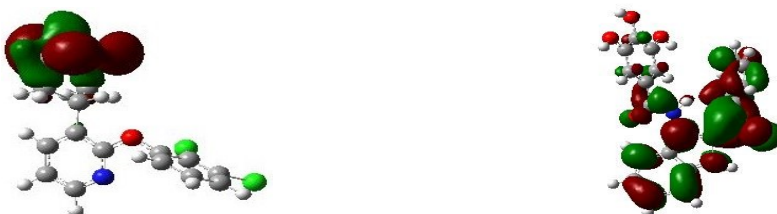

12a

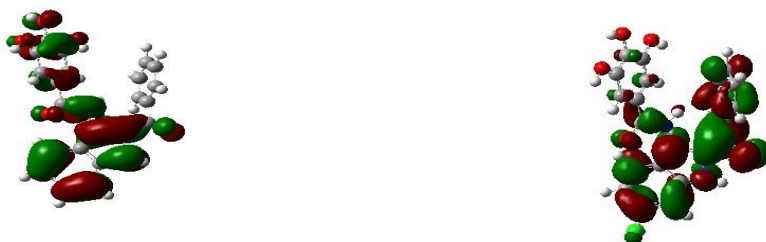

12b

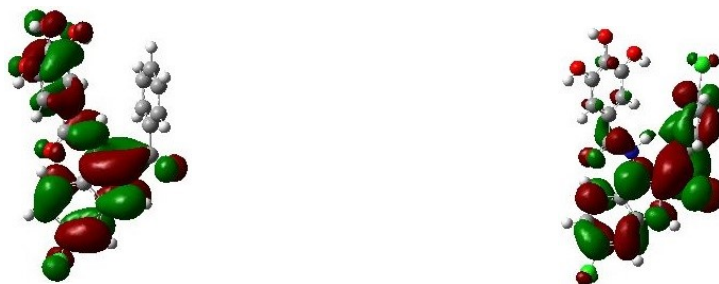

12c

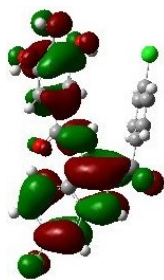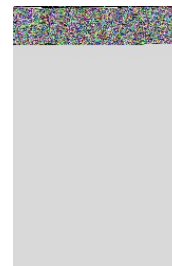

**Supplementary Figure 1:** The Frontier Molecular Orbitals (FMOs) Highest occupied molecular orbital (HOMO) and Least unoccupied molecular orbital (LUMO) diagram for the reference drugs Ref (1-4) and studied 12 inhibitors.

Optimized coordinates of for the reference drugs Ref (1-4) and studied 12 inhibitors with wb97xd/6-31g(d,p) method and water as a solvent.

Ref 1 (Diazepam)

|    |             |             |             |
|----|-------------|-------------|-------------|
| C1 | 0.52790300  | 4.22270300  | -0.55491300 |
| O  | 2.43290500  | -3.54623400 | -0.13991800 |
| N  | 2.10193100  | -1.40776000 | 0.54794800  |
| N  | -0.31617000 | -1.94619500 | -1.09964000 |
| C  | 0.41530000  | 0.21552900  | -0.22866900 |
| C  | 1.69965400  | -0.08281600 | 0.26222900  |
| C  | -0.58942400 | -0.84745700 | -0.50044500 |
| C  | 1.05327200  | -2.15150300 | -1.54121500 |
| C  | 1.93337900  | -2.45012300 | -0.33642900 |
| C  | -1.99627600 | -0.62175800 | -0.06418700 |
| C  | 0.06958700  | 1.55017200  | -0.47386800 |
| C  | 2.59179100  | 0.96426900  | 0.52371000  |
| C  | 2.95108300  | -1.65417000 | 1.71161900  |
| C  | 0.97727200  | 2.56354300  | -0.22691700 |
| C  | 2.24063500  | 2.28207600  | 0.28400700  |
| C  | -2.28951600 | 0.12658600  | 1.08087200  |
| C  | -3.04498900 | -1.20262400 | -0.78586100 |
| C  | -3.60742200 | 0.28679900  | 1.49812600  |
| C  | -4.36071200 | -1.03432500 | -0.37302000 |
| C  | -4.64515500 | -0.29052300 | 0.77153300  |
| H  | 1.45294800  | -1.28519300 | -2.08657900 |
| H  | 1.09522400  | -3.02470000 | -2.19126700 |
| H  | -0.91782800 | 1.78323000  | -0.85556900 |
| H  | 3.58085300  | 0.74588200  | 0.90811100  |
| H  | 2.68193200  | -0.95520700 | 2.50321200  |
| H  | 4.01337400  | -1.54413800 | 1.47272900  |
| H  | 2.77854800  | -2.67441000 | 2.05015800  |
| H  | 2.94702300  | 3.07964900  | 0.48146300  |
| H  | -1.48528900 | 0.57454700  | 1.65567300  |
| H  | -2.81320200 | -1.77966600 | -1.67441600 |
| H  | -3.82201600 | 0.86044100  | 2.39373800  |
| H  | -5.16721000 | -1.48141500 | -0.94503000 |
| H  | -5.67316000 | -0.15945800 | 1.09357700  |

## Ref 2 (Chloroquine)

|    |             |             |             |
|----|-------------|-------------|-------------|
| Cl | 5.25008900  | -0.97342100 | -0.99081900 |
| N  | -2.39921800 | -1.68931900 | -0.41924300 |
| N  | -0.66968000 | 2.29083800  | -0.13598400 |
| N  | 1.73220100  | 0.04909300  | 2.51755500  |
| C  | -2.91846600 | 1.25083100  | -0.07773700 |
| C  | -2.79775700 | 0.56338200  | -1.43870100 |
| C  | -2.09984600 | 2.54714700  | 0.04026300  |
| C  | -3.17625900 | -0.91794800 | -1.38793900 |
| C  | -2.52629000 | 3.61549200  | -0.96140800 |
| C  | -1.02983600 | -1.92141700 | -0.87592300 |
| C  | -3.08710800 | -2.93189900 | -0.06818000 |
| C  | 0.08195000  | 1.53481500  | 0.70766400  |
| C  | 1.33074300  | 0.96027900  | 0.26848300  |
| C  | -0.07906800 | -2.29168000 | 0.25677400  |
| C  | -4.17687700 | -2.72241700 | 0.97806600  |
| C  | -0.28792800 | 1.28885700  | 2.02625700  |
| C  | 2.10392200  | 0.23973900  | 1.21914000  |
| C  | 1.80137800  | 1.04567900  | -1.06452600 |
| C  | 0.56841100  | 0.56384200  | 2.86467400  |
| C  | 3.32875000  | -0.34825400 | 0.80986700  |
| C  | 2.98135200  | 0.46110700  | -1.45021900 |
| C  | 3.74185600  | -0.23394800 | -0.48921100 |
| H  | -2.57720300 | 0.54645900  | 0.68687700  |
| H  | -3.96896100 | 1.47546700  | 0.14228300  |
| H  | -1.77277100 | 0.66526600  | -1.81369400 |
| H  | -3.43845200 | 1.05173400  | -2.18114700 |
| H  | -2.24376100 | 2.95835100  | 1.04565000  |
| H  | -4.23188800 | -0.99279900 | -1.10746200 |
| H  | -3.09277900 | -1.35458400 | -2.40111000 |
| H  | -0.34100800 | 2.37867400  | -1.08398700 |
| H  | -1.96978900 | 4.54286400  | -0.80410300 |
| H  | -3.59246300 | 3.82546100  | -0.84783700 |
| H  | -2.35812100 | 3.28384800  | -1.99152200 |
| H  | -0.99676500 | -2.68949600 | -1.67177000 |
| H  | -0.66233300 | -0.99514800 | -1.32658000 |
| H  | -3.50940300 | -3.41730100 | -0.96730600 |
| H  | -2.35196200 | -3.63209400 | 0.33695800  |
| H  | -0.13674000 | -1.54154800 | 1.04968100  |
| H  | -0.30339700 | -3.26929200 | 0.69320000  |
| H  | 0.95067200  | -2.32231900 | -0.11222000 |
| H  | -3.74387700 | -2.31343900 | 1.89529600  |
| H  | -4.94988500 | -2.02929600 | 0.63293300  |
| H  | -4.66566100 | -3.67191200 | 1.21560600  |
| H  | -1.21887900 | 1.66589700  | 2.42945600  |
| H  | 1.23084000  | 1.56668200  | -1.82585400 |
| H  | 0.26330900  | 0.40417800  | 3.89760900  |
| H  | 3.90725900  | -0.89147500 | 1.54769000  |
| H  | 3.32581100  | 0.52805600  | -2.47508100 |

## Ref 3 (Chloramphenicol)

|    |             |             |             |
|----|-------------|-------------|-------------|
| Cl | -5.35776900 | 0.59176800  | 1.20091500  |
| Cl | -4.90861300 | -1.45832800 | -0.86497200 |
| O  | -0.18469100 | -1.36315600 | -1.23311000 |
| O  | -0.26960600 | 2.77203900  | -0.67249700 |

|   |             |             |             |
|---|-------------|-------------|-------------|
| O | -2.65747400 | -0.99415000 | 1.26955700  |
| O | 6.54862900  | 0.59681100  | 0.16548300  |
| O | 6.21880000  | -1.33600700 | 1.06675200  |
| N | -1.94983300 | 0.58780600  | -0.21393600 |
| N | 5.82568700  | -0.34215000 | 0.47083300  |
| C | -0.54615000 | 0.58338900  | 0.17514000  |
| C | 0.28305400  | -0.05872900 | -0.96655200 |
| C | 1.74628000  | -0.14551600 | -0.60130600 |
| C | -0.12471900 | 2.00631100  | 0.51142400  |
| C | 2.60735600  | 0.90903800  | -0.91560200 |
| C | 2.24022900  | -1.26354000 | 0.07370300  |
| C | -2.88040900 | -0.17485200 | 0.39617200  |
| C | 3.94810000  | 0.85547600  | -0.56376800 |
| C | 3.57941000  | -1.33569700 | 0.43034200  |
| C | 4.41201700  | -0.27215800 | 0.10312300  |
| C | -4.30825300 | 0.05713500  | -0.13818100 |
| H | -0.45817700 | -0.04611000 | 1.06399400  |
| H | 0.18195500  | 0.57851000  | -1.85487300 |
| H | 0.90999100  | 2.01199000  | 0.87456000  |
| H | -0.77097200 | 2.38172300  | 1.31386400  |
| H | -2.22564900 | 1.31793900  | -0.85754500 |
| H | 2.21790000  | 1.78267200  | -1.42890600 |
| H | 1.57102500  | -2.08260900 | 0.30859900  |
| H | -1.10439800 | -1.28911500 | -1.50901600 |
| H | 4.62736500  | 1.66304000  | -0.80341800 |
| H | 3.97852800  | -2.19734500 | 0.94940200  |
| H | -0.15415000 | 3.70054100  | -0.45216400 |
| H | -4.36265500 | 0.82124500  | -0.91027300 |

#### Ref 4 (Bendamustine)

|    |             |             |             |
|----|-------------|-------------|-------------|
| Cl | 3.89105000  | 3.28464300  | 0.23014300  |
| Cl | 5.04096900  | -2.06063000 | -1.20260700 |
| O  | -5.34248700 | 2.67418700  | -1.57778300 |
| O  | -6.61706400 | 1.56683000  | -0.10619200 |
| N  | -2.12376200 | -1.36852000 | 1.25962700  |
| N  | 3.04119000  | 0.18264900  | -0.02911700 |
| N  | -1.61825800 | -1.20630400 | -0.92136100 |
| C  | -0.80270400 | -0.96127000 | 1.19547300  |
| C  | -2.55065100 | -1.49516700 | -0.03569600 |
| C  | -0.50488900 | -0.86765100 | -0.17034800 |
| C  | -3.95129800 | -1.87438200 | -0.39837400 |
| C  | 1.75120700  | -0.19485600 | 0.35519900  |
| C  | 0.76754900  | -0.48393400 | -0.60085100 |
| C  | -4.96584800 | -0.74085300 | -0.17998400 |
| C  | 0.15156600  | -0.67638900 | 2.16516200  |
| C  | 1.41387800  | -0.29926200 | 1.73379700  |
| C  | 4.01872000  | 0.61771500  | 0.94390400  |
| C  | 3.42453100  | 0.16897600  | -1.42324000 |
| C  | -2.86206300 | -1.59069600 | 2.48616100  |
| C  | -4.63623600 | 0.49788300  | -1.00406200 |
| C  | 3.77703600  | 2.01165500  | 1.51234600  |
| C  | 3.64946300  | -1.22325800 | -2.00305200 |
| C  | -5.64409400 | 1.60324800  | -0.82766000 |
| H  | -4.26497000 | -2.75794100 | 0.16694700  |
| H  | -3.93643600 | -2.15816400 | -1.45375000 |
| H  | 0.95503900  | -0.42148300 | -1.66504900 |
| H  | -5.01161600 | -0.47054900 | 0.87985000  |

|   |             |             |             |
|---|-------------|-------------|-------------|
| H | -5.96054500 | -1.10666800 | -0.44950100 |
| H | -0.06538300 | -0.74286800 | 3.22607000  |
| H | 2.15444900  | -0.08465700 | 2.49290500  |
| H | 4.06944100  | -0.07740100 | 1.79100400  |
| H | 5.00456000  | 0.58467300  | 0.47767100  |
| H | 2.66813700  | 0.66520900  | -2.04468500 |
| H | 4.33560600  | 0.75787100  | -1.53833900 |
| H | -3.09294500 | -0.64136400 | 2.97670400  |
| H | -2.26731200 | -2.20776100 | 3.16329600  |
| H | -3.79251900 | -2.11420000 | 2.27126500  |
| H | -4.58327900 | 0.25918600  | -2.07250700 |
| H | -3.65096700 | 0.90077100  | -0.74398400 |
| H | 4.52819800  | 2.25602900  | 2.26325800  |
| H | 2.78240900  | 2.11121400  | 1.94585700  |
| H | 3.88689300  | -1.16399500 | -3.06516200 |
| H | 2.78665900  | -1.87198600 | -1.85719000 |
| H | -6.02452000 | 3.34238600  | -1.41767100 |

1a

|   |             |             |             |
|---|-------------|-------------|-------------|
| C | -5.50304700 | 0.84239300  | -0.61878800 |
| C | -6.72738100 | 0.23302900  | -0.42257600 |
| C | -6.42380900 | -0.88516000 | 0.38240300  |
| N | -4.57766900 | 0.11109400  | 0.07427000  |
| H | -7.68485200 | 0.53954300  | -0.81107500 |
| N | -5.14594900 | -0.98773300 | 0.68853900  |
| N | -5.17176800 | 1.99539800  | -1.29293700 |
| H | -5.87569400 | 2.27566200  | -1.96121400 |
| H | -4.24880200 | 1.99145900  | -1.70995000 |
| O | -7.32836800 | -1.77884000 | 0.81575000  |
| H | -6.86552200 | -2.44234900 | 1.34200500  |
| C | -3.19491300 | 0.26922100  | 0.10319300  |
| C | -2.47475800 | 1.41744800  | 0.15951300  |
| S | -2.19164100 | -1.16615200 | 0.00040500  |
| C | -1.06447600 | 1.17076800  | 0.10856600  |
| H | -2.90842900 | 2.40414000  | 0.24694000  |
| C | -0.76739200 | -0.17586700 | 0.03458600  |
| C | -0.01704200 | 2.19217000  | 0.16350300  |
| O | 1.18487900  | 1.95299100  | 0.15277300  |
| O | -0.50810600 | 3.42834500  | 0.22772200  |
| C | 0.45588000  | 4.48676100  | 0.28888000  |
| H | 1.08054700  | 4.38164900  | 1.17758700  |
| H | 1.08620800  | 4.47947700  | -0.60200600 |
| H | -0.12373700 | 5.40595000  | 0.33748400  |
| N | 0.50849900  | -0.68431800 | 0.01779200  |
| H | 1.24394700  | 0.02199600  | 0.06551000  |
| C | 0.83509100  | -2.00330700 | -0.09188500 |
| C | 2.29402000  | -2.26635900 | -0.11817900 |
| O | 0.00959900  | -2.90445000 | -0.16179400 |
| C | 2.73620400  | -3.62473700 | -0.20994800 |
| N | 3.18117500  | -4.69399400 | -0.28257600 |
| N | 3.11015200  | -1.25468300 | -0.06071700 |



|   |            |             |             |
|---|------------|-------------|-------------|
| N | 4.39623800 | -1.39289600 | -0.08038000 |
| C | 5.25152900 | -0.27126300 | -0.01969900 |
| C | 6.62662100 | -0.50084400 | -0.03589800 |
| C | 4.74077900 | 1.02520900  | 0.05328900  |
| C | 7.49917000 | 0.58038900  | 0.02212600  |
| H | 7.01251000 | -1.51424100 | -0.09250900 |
| C | 5.62841900 | 2.09334000  | 0.11085200  |
| H | 3.67036400 | 1.19479000  | 0.06465200  |
| C | 7.00566200 | 1.88014900  | 0.09569800  |
| H | 8.56882200 | 0.40103100  | 0.00971400  |
| H | 5.23530600 | 3.10296600  | 0.16784100  |
| H | 7.68858300 | 2.72140400  | 0.14087500  |
| H | 4.81486900 | -2.31950600 | -0.13968300 |

1b

|   |             |             |             |
|---|-------------|-------------|-------------|
| C | -5.95603200 | -1.22542500 | 0.59979600  |
| C | -7.23424500 | -0.74883000 | 0.38178700  |
| C | -7.03842100 | 0.38373500  | -0.43644900 |
| N | -5.10297000 | -0.41182200 | -0.09438000 |
| H | -8.15954900 | -1.14725600 | 0.76468600  |
| N | -5.77448600 | 0.61390400  | -0.73083200 |
| N | -5.51529000 | -2.32844000 | 1.29458700  |
| H | -6.19409200 | -2.66995200 | 1.96038200  |
| H | -4.60241500 | -2.22321100 | 1.72052000  |
| O | -8.02548900 | 1.17287800  | -0.89200200 |
| H | -7.62798100 | 1.87364300  | -1.42334900 |
| C | -3.71115100 | -0.42584000 | -0.10595900 |
| C | -2.87493200 | -1.49360000 | -0.14065600 |
| S | -2.86389700 | 1.10703400  | -0.00808800 |
| C | -1.49867400 | -1.10081400 | -0.07812400 |
| H | -3.20258700 | -2.52094200 | -0.22103900 |
| C | -1.34464400 | 0.27013600  | -0.01730800 |
| C | -0.34950800 | -2.00772700 | -0.10927700 |
| O | 0.82076900  | -1.64365900 | -0.09252000 |
| O | -0.70781100 | -3.28898600 | -0.15803800 |
| C | 0.36184600  | -4.24199900 | -0.19460500 |
| H | 0.98004200  | -4.08612200 | -1.08036800 |
| H | 0.97963300  | -4.15509500 | 0.70083900  |
| H | -0.11844200 | -5.21722400 | -0.23251700 |
| N | -0.12834100 | 0.90821700  | 0.00401900  |
| H | 0.67625300  | 0.28108000  | -0.03253100 |
| C | 0.06070400  | 2.25360000  | 0.10516100  |
| C | 1.48740200  | 2.66295500  | 0.13502600  |
| O | -0.85060600 | 3.06801600  | 0.16479700  |
| C | 1.78782800  | 4.05993400  | 0.22878000  |
| N | 2.11462800  | 5.17060100  | 0.30388600  |
| N | 2.39851500  | 1.73869200  | 0.07756000  |
| N | 3.66717500  | 2.00146300  | 0.09675300  |
| C | 4.61888500  | 0.96438700  | 0.03753100  |
| C | 5.96809000  | 1.31347100  | 0.05780200  |

|    |            |             |             |
|----|------------|-------------|-------------|
| C  | 4.22966100 | -0.37336300 | -0.03842600 |
| C  | 6.93952300 | 0.32230800  | 0.00116800  |
| H  | 6.26604300 | 2.35521300  | 0.11726700  |
| C  | 5.20246700 | -1.36238900 | -0.09506000 |
| H  | 3.18063900 | -0.64446800 | -0.05313000 |
| C  | 6.54775600 | -1.00880900 | -0.07496400 |
| H  | 7.98967400 | 0.58827300  | 0.01642900  |
| H  | 4.91048200 | -2.40430200 | -0.15426900 |
| H  | 3.99814200 | 2.96280700  | 0.15541900  |
| C1 | 7.76809900 | -2.26292200 | -0.14619600 |

2a

|   |             |             |             |
|---|-------------|-------------|-------------|
| C | -4.33415100 | -0.61788200 | 0.09969700  |
| C | -3.09246500 | -1.24110900 | 0.04233800  |
| C | -1.93673800 | -0.46340700 | -0.03667000 |
| C | -2.00659100 | 0.93926400  | -0.06258400 |
| C | -3.27098300 | 1.53823500  | -0.00075000 |
| C | -4.42660100 | 0.78857200  | 0.07929800  |
| H | -0.64720500 | -2.07321200 | -0.16298800 |
| H | -3.04025700 | -2.32417700 | 0.06068400  |
| C | -0.78881900 | 1.76107700  | -0.15224000 |
| H | -3.31779900 | 2.62153700  | -0.01826700 |
| H | -5.38695100 | 1.28565400  | 0.12527300  |
| C | 0.46060000  | 1.00739600  | -0.19348400 |
| C | 0.46622400  | -0.36733900 | -0.17220700 |
| N | -0.69421200 | -1.06618900 | -0.09725600 |
| O | -5.39789900 | -1.44353000 | 0.17476400  |
| O | -0.83564600 | 2.99479600  | -0.15447500 |
| C | -6.69731100 | -0.87355400 | 0.23715500  |
| H | -7.38794300 | -1.71379400 | 0.29021000  |
| H | -6.81601000 | -0.24980300 | 1.12910100  |
| H | -6.91540400 | -0.28089700 | -0.65720500 |
| C | 1.74261000  | 1.76272200  | -0.24241500 |
| O | 2.01356200  | 2.62118300  | -1.05551600 |
| O | 2.58088600  | 1.36694700  | 0.72191100  |
| C | 3.94802000  | 1.80040300  | 0.61867500  |
| H | 4.25201900  | 1.75528200  | -0.43067500 |
| H | 4.01635900  | 2.84099100  | 0.94884200  |
| C | 1.69653700  | -1.19617600 | -0.25518900 |
| C | 2.62301100  | -0.98281400 | -1.27986200 |
| C | 1.93163200  | -2.19319500 | 0.69446500  |
| C | 3.78048300  | -1.74900500 | -1.34285900 |
| H | 2.43590400  | -0.21689800 | -2.02600500 |
| C | 3.09355400  | -2.95633400 | 0.62949400  |
| H | 1.22180800  | -2.35401400 | 1.50024800  |
| C | 4.01936400  | -2.73460200 | -0.38650400 |

|   |            |             |             |
|---|------------|-------------|-------------|
| H | 4.49517800 | -1.57875000 | -2.14083700 |
| H | 3.27703200 | -3.72015200 | 1.37747100  |
| H | 4.92506500 | -3.32985600 | -0.43497700 |
| C | 4.77486100 | 0.87192100  | 1.48094400  |
| H | 4.68114000 | -0.15850600 | 1.12634800  |
| H | 5.82700400 | 1.16376000  | 1.43182600  |
| H | 4.45290200 | 0.91595700  | 2.52446300  |

2b

|    |             |             |             |
|----|-------------|-------------|-------------|
| C  | -4.73377300 | -0.79012500 | -0.01034000 |
| C  | -3.45636000 | -1.32593100 | 0.11170400  |
| C  | -2.34829800 | -0.48157800 | 0.03836800  |
| C  | -2.50058300 | 0.90061000  | -0.16001300 |
| C  | -3.79948300 | 1.41138700  | -0.27681600 |
| C  | -4.90930200 | 0.59485300  | -0.20586400 |
| H  | -0.95814900 | -2.00009500 | 0.21625100  |
| H  | -3.33980100 | -2.39333600 | 0.26376100  |
| C  | -1.33256500 | 1.79166300  | -0.24461600 |
| H  | -3.91077700 | 2.47960400  | -0.42704400 |
| H  | -5.89840400 | 1.02386300  | -0.30067900 |
| C  | -0.03920500 | 1.12848000  | -0.09536400 |
| C  | 0.04513300  | -0.23008000 | 0.09176500  |
| N  | -1.07081600 | -0.99787100 | 0.15520400  |
| O  | -5.74775000 | -1.67489400 | 0.07268700  |
| O  | -1.45261700 | 3.01032400  | -0.39525500 |
| C  | -7.07971100 | -1.19489500 | -0.04287800 |
| H  | -7.72008100 | -2.07044300 | 0.05227900  |
| H  | -7.31702200 | -0.48370700 | 0.75494900  |
| H  | -7.25028500 | -0.72507800 | -1.01697000 |
| C  | 1.19408100  | 1.96142700  | -0.13816200 |
| O  | 1.47149000  | 2.74655400  | -1.01980300 |
| O  | 1.98268100  | 1.72347900  | 0.91594100  |
| C  | 3.32559900  | 2.23539300  | 0.85509300  |
| H  | 3.71605600  | 2.07621000  | -0.15406300 |
| H  | 3.30458400  | 3.31198900  | 1.04629200  |
| C  | 1.32669600  | -0.97395800 | 0.21412700  |
| C  | 2.31824600  | -0.81216400 | -0.75589700 |
| C  | 1.54031600  | -1.82784900 | 1.29692600  |
| C  | 3.51787600  | -1.49322200 | -0.61173500 |
| H  | 2.15740100  | -0.15968000 | -1.60690800 |
| C  | 2.75027000  | -2.50350600 | 1.41918700  |
| H  | 0.77574500  | -1.94310700 | 2.05809600  |
| C  | 3.75112000  | -2.34041600 | 0.46712600  |
| H  | 2.92105600  | -3.15736800 | 2.26684600  |
| H  | 4.69671300  | -2.86139900 | 0.55980600  |
| C  | 4.13367400  | 1.48696700  | 1.89227900  |
| H  | 4.12746700  | 0.41423800  | 1.67892800  |
| H  | 5.16820300  | 1.83886200  | 1.87663100  |
| H  | 3.72911400  | 1.64753000  | 2.89470400  |
| C1 | 4.76712200  | -1.27523700 | -1.81807100 |

## 3-1a

|   |             |             |             |
|---|-------------|-------------|-------------|
| C | -2.27598200 | -0.45545700 | -0.10516100 |
| C | -2.86312500 | 0.80182600  | 0.15835900  |
| C | -3.96429900 | 1.27664900  | -0.55661200 |
| C | -4.47159800 | 0.46379300  | -1.55872600 |
| C | -3.89782200 | -0.79042300 | -1.84049100 |
| C | -2.80801900 | -1.25777800 | -1.12325700 |
| C | -1.18915800 | -0.59773000 | 0.82923600  |
| C | -1.14531300 | 0.54694400  | 1.59623900  |
| H | -4.40254200 | 2.24458900  | -0.33660100 |
| H | -4.31907600 | -1.39974500 | -2.63382400 |
| H | -2.36921600 | -2.22649000 | -1.34292300 |
| H | -2.33414800 | 2.29030200  | 1.58165100  |
| N | -2.15137200 | 1.38095400  | 1.18785800  |
| C | -0.18089200 | 0.95232400  | 2.65448400  |
| H | 0.58961900  | 1.60106300  | 2.22707200  |
| H | -0.68102500 | 1.48744400  | 3.46591400  |
| H | 0.31466700  | 0.07016800  | 3.06426300  |
| S | -0.11437200 | -1.97355600 | 0.95704900  |
| C | 1.41151600  | -1.38375700 | 0.22600800  |
| C | 2.39533900  | -2.33490900 | -0.08303600 |
| C | 2.74281300  | 0.33073500  | -0.46810500 |
| C | 3.59623000  | -1.88875300 | -0.60714800 |
| H | 2.21261600  | -3.39141200 | 0.07955600  |
| C | 3.78331600  | -0.52193600 | -0.80964500 |
| H | 4.37856000  | -2.59524000 | -0.86130700 |
| H | 4.70281300  | -0.12159100 | -1.21700300 |
| N | 1.57740000  | -0.08478400 | 0.04194600  |
| C | 2.92987900  | 1.80545700  | -0.66677100 |
| O | 3.93331500  | 2.28883800  | -1.14787800 |
| O | 1.89052500  | 2.53589600  | -0.25940600 |
| H | 2.11324900  | 3.46346900  | -0.42538400 |
| H | -5.32580400 | 0.80134400  | -2.13680100 |

## 3-1b

|   |             |             |             |
|---|-------------|-------------|-------------|
| C | -1.62390600 | -0.72238900 | 0.29016300  |
| C | -2.24299500 | 0.42690300  | 0.83013800  |
| C | -3.47599600 | 0.89978900  | 0.37950500  |
| C | -4.06924800 | 0.18076900  | -0.64280200 |
| C | -3.48449100 | -0.96297000 | -1.21015000 |
| C | -2.26221000 | -1.41738400 | -0.74354800 |
| C | -0.39128300 | -0.89449500 | 1.01229500  |
| C | -0.29978200 | 0.13061400  | 1.92898400  |
| H | -3.94327300 | 1.78091300  | 0.80317200  |
| H | -3.99555000 | -1.48377100 | -2.01146300 |
| H | -1.80574800 | -2.30129000 | -1.17723000 |
| H | -1.59157800 | 1.74229800  | 2.36574700  |
| N | -1.41434200 | 0.91905000  | 1.81210300  |
| C | 0.79500400  | 0.47255500  | 2.87592200  |

|    |             |             |             |
|----|-------------|-------------|-------------|
| H  | 1.44263500  | 1.23392900  | 2.43093900  |
| H  | 0.39956900  | 0.85206000  | 3.82151500  |
| H  | 1.40471300  | -0.41087300 | 3.07451800  |
| S  | 0.77669000  | -2.17396900 | 0.76005000  |
| C  | 2.12723100  | -1.34583400 | -0.07762000 |
| C  | 3.10349200  | -2.14781400 | -0.68659700 |
| C  | 3.22606100  | 0.56515600  | -0.65385600 |
| C  | 4.17662500  | -1.52211800 | -1.29741000 |
| H  | 3.01203600  | -3.22835500 | -0.68299400 |
| C  | 4.24740200  | -0.12969600 | -1.28668500 |
| H  | 4.94894200  | -2.10906900 | -1.78191000 |
| H  | 5.06500400  | 0.40780900  | -1.74963700 |
| N  | 2.18331400  | -0.02496500 | -0.05769500 |
| C  | 3.29191900  | 2.06298000  | -0.61808000 |
| O  | 4.17215200  | 2.70243400  | -1.15471400 |
| O  | 2.29378000  | 2.62471800  | 0.06580500  |
| H  | 2.43049600  | 3.58271200  | 0.03316900  |
| Cl | -5.62420500 | 0.72146800  | -1.26222100 |

3-2a

|   |             |             |             |
|---|-------------|-------------|-------------|
| C | -2.02956800 | -0.81936900 | -0.18704300 |
| C | -2.74831800 | 0.39341500  | -0.11930600 |
| C | -3.82421100 | 0.67146600  | -0.96563400 |
| C | -4.16703300 | -0.29533800 | -1.89910100 |
| C | -3.45809000 | -1.50785800 | -1.98636700 |
| C | -2.39487100 | -1.77916900 | -1.13939400 |
| C | -1.02185300 | -0.74206000 | 0.83458300  |
| C | -1.15148000 | 0.48243600  | 1.45779700  |
| H | -4.37204400 | 1.60566400  | -0.89761700 |
| H | -3.75192000 | -2.24149500 | -2.73039600 |
| H | -1.85128000 | -2.71669700 | -1.20866900 |
| N | -2.19107700 | 1.16840800  | 0.87918600  |
| C | -0.32131900 | 1.06804500  | 2.54614000  |
| H | 0.25429600  | 1.92339100  | 2.17927600  |
| H | -0.93285300 | 1.40103100  | 3.38973800  |
| H | 0.38459300  | 0.31786100  | 2.90498400  |
| S | 0.17212300  | -1.96806100 | 1.19778200  |
| C | 1.66440200  | -1.33295900 | 0.43501400  |
| C | 2.76511900  | -2.19806600 | 0.34270400  |
| C | 2.83444600  | 0.37924400  | -0.50922400 |
| C | 3.93797000  | -1.70997000 | -0.20619700 |
| H | 2.69233900  | -3.22305400 | 0.68941100  |
| C | 3.98264500  | -0.38786400 | -0.64742400 |
| H | 4.80867700  | -2.35007200 | -0.29524400 |
| H | 4.87443500  | 0.04242300  | -1.08470500 |
| N | 1.69389900  | -0.07668100 | 0.02323700  |
| C | 2.86660600  | 1.80565600  | -0.97201200 |
| O | 3.84285300  | 2.31731600  | -1.47927600 |
| O | 1.72135900  | 2.45882500  | -0.77041600 |
| H | 1.84766700  | 3.36070100  | -1.09932700 |
| H | -4.99699500 | -0.11307300 | -2.57415500 |

|   |             |            |            |
|---|-------------|------------|------------|
| C | -2.66600400 | 2.49206200 | 1.22973700 |
| H | -2.70210500 | 3.12333500 | 0.33842200 |
| H | -3.66530500 | 2.44080200 | 1.67075000 |
| H | -1.98758500 | 2.94892100 | 1.94795900 |

3-2b

|    |             |             |             |
|----|-------------|-------------|-------------|
| C  | 1.44805300  | -0.84714500 | -0.35971700 |
| C  | 2.14271400  | 0.35525800  | -0.61298800 |
| C  | 3.35474800  | 0.66809600  | 0.00524500  |
| C  | 3.84460300  | -0.26857000 | 0.89848000  |
| C  | 3.18027300  | -1.47238200 | 1.18204300  |
| C  | 1.98139300  | -1.76423800 | 0.55221500  |
| C  | 0.27095400  | -0.80681100 | -1.18035200 |
| C  | 0.28499000  | 0.38810200  | -1.86975000 |
| H  | 3.88730900  | 1.58991700  | -0.19704800 |
| H  | 3.61151500  | -2.16717500 | 1.89321800  |
| H  | 1.46329600  | -2.69357000 | 0.76599700  |
| N  | 1.41547500  | 1.08989100  | -1.52437700 |
| C  | -0.72943400 | 0.93543700  | -2.81125900 |
| H  | -1.21482300 | 1.82004800  | -2.38800800 |
| H  | -0.28375700 | 1.21326700  | -3.77071300 |
| H  | -1.49822400 | 0.18311400  | -2.99129900 |
| S  | -0.97714100 | -2.03049600 | -1.24996700 |
| C  | -2.27866500 | -1.33602000 | -0.23115500 |
| C  | -3.35446900 | -2.16973300 | 0.10817000  |
| C  | -3.20282200 | 0.43382600  | 0.86616500  |
| C  | -4.38422200 | -1.63466200 | 0.86238300  |
| H  | -3.37259800 | -3.20628500 | -0.21032000 |
| C  | -4.31460300 | -0.29901000 | 1.25706900  |
| H  | -5.23176700 | -2.24899500 | 1.14527300  |
| H  | -5.09270800 | 0.16708700  | 1.84779800  |
| N  | -2.20090100 | -0.06775300 | 0.13392100  |
| C  | -3.11192000 | 1.87414800  | 1.27403700  |
| O  | -3.95663500 | 2.42940300  | 1.94496400  |
| O  | -2.01496200 | 2.48650500  | 0.82603800  |
| H  | -2.05305600 | 3.40173400  | 1.13972600  |
| C  | 1.81885200  | 2.39435200  | -2.01303100 |
| H  | 2.00646100  | 3.06560400  | -1.17150600 |
| H  | 2.72581100  | 2.31589200  | -2.61823900 |
| H  | 1.02447200  | 2.82017800  | -2.62287700 |
| Cl | 5.36649400  | 0.06123600  | 1.71631200  |

3-3a

|   |             |            |            |
|---|-------------|------------|------------|
| C | -0.32669500 | 2.22256700 | 0.03307800 |
| C | -1.52703900 | 1.60664000 | 0.43909500 |
| C | -2.38385400 | 2.18183000 | 1.37792500 |
| C | -2.00532300 | 3.40103600 | 1.91982100 |
| C | -0.80736500 | 4.02970200 | 1.53380300 |
| C | 0.03370000  | 3.45383300 | 0.59445900 |

|   |             |             |             |
|---|-------------|-------------|-------------|
| C | 0.26772200  | 1.34695900  | -0.94334000 |
| C | -0.55435900 | 0.25424600  | -1.08911300 |
| H | -3.30487300 | 1.69034500  | 1.67288800  |
| H | -0.54032900 | 4.98217500  | 1.98040400  |
| H | 0.95620000  | 3.94259600  | 0.29610700  |
| N | -1.64564600 | 0.41071600  | -0.25680000 |
| C | -0.35912100 | -0.98063200 | -1.89447700 |
| H | -0.12535100 | -1.82069800 | -1.23278600 |
| H | -1.25566100 | -1.23007000 | -2.46550100 |
| H | 0.48081700  | -0.84253700 | -2.57671100 |
| S | 1.80981600  | 1.58887400  | -1.73676300 |
| C | 2.88714100  | 0.44895200  | -0.86753300 |
| C | 4.26746600  | 0.55396900  | -1.09398000 |
| C | 3.17251500  | -1.33066500 | 0.52724300  |
| C | 5.10476300  | -0.34728300 | -0.45939300 |
| H | 4.66402000  | 1.32520000  | -1.74515600 |
| C | 4.55200000  | -1.31790100 | 0.37552900  |
| H | 6.17758400  | -0.29530400 | -0.60804600 |
| H | 5.16287000  | -2.04572100 | 0.89403200  |
| N | 2.35042100  | -0.46715100 | -0.08005400 |
| C | 2.55598700  | -2.37464500 | 1.41047600  |
| O | 3.20788200  | -3.18854200 | 2.03060300  |
| O | 1.22315300  | -2.32709700 | 1.44466400  |
| H | 0.92851100  | -3.03732100 | 2.03311500  |
| C | -2.67870100 | -0.52599700 | -0.06347900 |
| C | -2.99820100 | -1.20309200 | 1.12596800  |
| N | -3.48295800 | -0.85986100 | -1.06875500 |
| C | -4.07214600 | -1.99257900 | 0.77114800  |
| H | -2.51200600 | -1.12653700 | 2.08532100  |
| H | -4.66477400 | -2.69248900 | 1.34033600  |
| N | -4.31793900 | -1.76412300 | -0.53802800 |
| C | -5.33916600 | -2.37307400 | -1.36789100 |
| H | -4.87286600 | -2.93072500 | -2.18155400 |
| H | -5.92707700 | -3.05253900 | -0.75217400 |
| H | -5.99039500 | -1.60114000 | -1.78023700 |
| H | -2.64509000 | 3.87762300  | 2.65545400  |

3-3b

|   |             |             |             |
|---|-------------|-------------|-------------|
| C | 0.52020900  | -1.69375100 | -0.72737000 |
| C | 1.56970600  | -0.88756000 | -0.24349000 |
| C | 2.65917700  | -1.40572400 | 0.45547000  |
| C | 2.65428800  | -2.77374200 | 0.66401600  |
| C | 1.62500800  | -3.61086700 | 0.20549900  |
| C | 0.55702700  | -3.07246900 | -0.49348600 |
| C | -0.39554800 | -0.80809900 | -1.39528300 |
| C | 0.10056200  | 0.46981300  | -1.28943100 |
| H | 3.46032400  | -0.77344200 | 0.81944200  |
| H | 1.67311900  | -4.67552800 | 0.40198800  |
| H | -0.24117600 | -3.71371400 | -0.85286500 |
| N | 1.29558900  | 0.42351700  | -0.59631100 |

|    |             |             |             |
|----|-------------|-------------|-------------|
| C  | -0.49873400 | 1.76057400  | -1.71894200 |
| H  | -0.84898000 | 2.31379900  | -0.84185300 |
| H  | 0.22670400  | 2.37878900  | -2.25142800 |
| H  | -1.35673700 | 1.56777100  | -2.36432900 |
| S  | -1.92183600 | -1.26494500 | -2.12146200 |
| C  | -3.11354600 | -0.69765900 | -0.90661900 |
| C  | -4.44783000 | -1.10076200 | -1.06106900 |
| C  | -3.61860100 | 0.54408000  | 0.93611100  |
| C  | -5.38044900 | -0.63459000 | -0.15036000 |
| H  | -4.73613900 | -1.76322000 | -1.86978700 |
| C  | -4.96431400 | 0.20973800  | 0.87856700  |
| H  | -6.42122400 | -0.92643800 | -0.23581500 |
| H  | -5.65418900 | 0.60152400  | 1.61495300  |
| N  | -2.70610400 | 0.10259000  | 0.06301100  |
| C  | -3.14915400 | 1.46007800  | 2.02703800  |
| O  | -3.88444600 | 1.90412200  | 2.88369100  |
| O  | -1.84706100 | 1.74329700  | 1.96204100  |
| H  | -1.64822300 | 2.33864700  | 2.69927200  |
| Cl | 3.99433400  | -3.49672900 | 1.54302900  |
| C  | 2.07699700  | 1.53286400  | -0.21781200 |
| C  | 2.34916700  | 1.97181600  | 1.08879300  |
| N  | 2.65079200  | 2.29811500  | -1.14151400 |
| C  | 3.14279100  | 3.08366800  | 0.89703200  |
| H  | 2.00804300  | 1.54517100  | 2.01846500  |
| H  | 3.60180600  | 3.76392200  | 1.59810900  |
| N  | 3.28586400  | 3.24463500  | -0.43730800 |
| C  | 4.03016300  | 4.27747600  | -1.13211900 |
| H  | 3.36530000  | 4.81975000  | -1.80564000 |
| H  | 4.44041400  | 4.96629100  | -0.39489400 |
| H  | 4.84421100  | 3.82953800  | -1.70401500 |

3-4a

|   |             |             |             |
|---|-------------|-------------|-------------|
| C | -0.18512900 | 1.77508300  | 0.12100200  |
| C | -1.39185100 | 1.29658700  | 0.66545700  |
| C | -1.94020700 | 1.81766800  | 1.83805800  |
| C | -1.23771500 | 2.83292800  | 2.46976300  |
| C | -0.02431500 | 3.31703700  | 1.94738100  |
| C | 0.50890700  | 2.79758000  | 0.77833800  |
| C | 0.05612100  | 1.00773100  | -1.07444400 |
| C | -0.97646900 | 0.10727100  | -1.21308800 |
| H | -2.87479300 | 1.44012100  | 2.23864500  |
| H | 0.49990900  | 4.10994400  | 2.47103100  |
| H | 1.44534600  | 3.17055000  | 0.37463800  |
| N | -1.86156000 | 0.28880200  | -0.16764000 |
| C | -1.19461400 | -0.94625200 | -2.24184700 |
| H | -1.33198900 | -1.92283500 | -1.76787100 |
| H | -2.08908400 | -0.74051700 | -2.83471500 |
| H | -0.32992500 | -0.99413000 | -2.90451400 |
| S | 1.41873700  | 1.19075900  | -2.16124100 |
| C | 2.73331000  | 0.32330600  | -1.31393900 |



|   |             |             |             |
|---|-------------|-------------|-------------|
| C | 4.02544800  | 0.44777800  | -1.83382500 |
| C | 3.59171300  | -1.11300700 | 0.42177100  |
| C | 5.09023400  | -0.21137300 | -1.22843500 |
| H | 4.20084700  | 1.06265700  | -2.71171700 |
| C | 4.88054700  | -0.99193200 | -0.09783600 |
| H | 6.08814100  | -0.10846800 | -1.64077300 |
| H | 5.70078600  | -1.50694100 | 0.38858500  |
| C | 3.39848100  | -1.95396200 | 1.63482900  |
| O | 4.29046000  | -2.54679000 | 2.20651700  |
| O | 2.12495000  | -1.99873800 | 2.04876800  |
| H | 2.09601100  | -2.56209700 | 2.83505500  |
| C | -3.04226000 | -0.44566400 | 0.05192400  |
| C | -3.36256000 | -1.22359300 | 1.17782900  |
| N | -4.00947100 | -0.45112400 | -0.86060700 |
| C | -4.61611900 | -1.71823600 | 0.88342300  |
| H | -2.76525900 | -1.39785400 | 2.05843300  |
| H | -5.27665600 | -2.36700200 | 1.43827600  |
| N | -4.95462600 | -1.24363800 | -0.33577300 |
| C | -6.17250800 | -1.49712800 | -1.08091600 |
| H | -5.93351000 | -1.98815500 | -2.02542600 |
| H | -6.81509100 | -2.14579900 | -0.48710900 |
| H | -6.68882200 | -0.55666300 | -1.27852400 |
| C | 2.51628900  | -0.46101900 | -0.18517400 |
| H | -1.63198900 | 3.26083400  | 3.38571100  |
| H | 1.51877900  | -0.56465900 | 0.22436900  |

### 3-4b

|   |             |             |             |
|---|-------------|-------------|-------------|
| C | 0.14611700  | -0.92312900 | -1.17127200 |
| C | 1.35391800  | -0.81333500 | -0.45657500 |
| C | 2.05141700  | -1.92381300 | 0.01770100  |
| C | 1.48051300  | -3.15736500 | -0.24209600 |
| C | 0.27231400  | -3.30785600 | -0.94105000 |
| C | -0.39793700 | -2.18930200 | -1.40786300 |
| C | -0.26310500 | 0.41980900  | -1.48974400 |
| C | 0.67683300  | 1.27974400  | -0.96780500 |
| H | 2.98375500  | -1.82780600 | 0.56113200  |
| H | -0.12823300 | -4.30039900 | -1.11032300 |
| H | -1.33253700 | -2.29473100 | -1.94913300 |
| N | 1.66436000  | 0.53316300  | -0.35161300 |
| C | 0.71947500  | 2.76712100  | -0.97258600 |
| H | 0.81676900  | 3.15093600  | 0.04735200  |
| H | 1.57435900  | 3.13445100  | -1.54533200 |
| H | -0.19962300 | 3.15702500  | -1.41103100 |
| S | -1.69430200 | 0.87577700  | -2.39214200 |
| C | -3.00102700 | 0.72669800  | -1.17991600 |
| C | -4.31772400 | 0.80750800  | -1.64347900 |
| C | -3.82934500 | 0.44479800  | 1.06623900  |
| C | -5.38066300 | 0.71300300  | -0.75139200 |
| H | -4.51332300 | 0.94159400  | -2.70329500 |
| C | -5.14324400 | 0.52848400  | 0.60543100  |

|    |             |             |             |
|----|-------------|-------------|-------------|
| H  | -6.39805100 | 0.77777000  | -1.12158500 |
| H  | -5.96100200 | 0.44657900  | 1.31193100  |
| C  | -3.60641400 | 0.24547500  | 2.52464200  |
| O  | -4.49475700 | 0.15564400  | 3.34711500  |
| O  | -2.31006800 | 0.17177400  | 2.85496700  |
| H  | -2.26238400 | 0.04314400  | 3.81289900  |
| C  | 2.80109600  | 1.04481700  | 0.30429300  |
| C  | 3.15853300  | 0.86575000  | 1.65133000  |
| N  | 3.68115100  | 1.78624900  | -0.36167900 |
| C  | 4.34129200  | 1.56651000  | 1.76666200  |
| H  | 2.62867600  | 0.31869700  | 2.41462700  |
| H  | 4.99799500  | 1.72677900  | 2.60814600  |
| N  | 4.60600100  | 2.10233700  | 0.55480600  |
| C  | 5.73337400  | 2.93361000  | 0.17895100  |
| H  | 5.37707700  | 3.90393100  | -0.16978500 |
| H  | 6.36880400  | 3.07234700  | 1.05249000  |
| H  | 6.30476700  | 2.44751200  | -0.61304300 |
| C  | -2.75662100 | 0.54786500  | 0.17817300  |
| Cl | 2.30219700  | -4.60156100 | 0.33034200  |
| H  | -1.74037500 | 0.48632400  | 0.54828800  |

#### 4a

|   |          |          |          |
|---|----------|----------|----------|
| C | 0.22912  | 2.9193   | -0.00071 |
| C | -1.06639 | 3.64529  | 0.00511  |
| C | -1.05257 | 5.07991  | 0.00461  |
| C | 0.13161  | 5.74044  | -0.00113 |
| C | 1.39068  | 5.03488  | -0.00679 |
| C | 1.44551  | 3.68004  | -0.00663 |
| C | -0.0159  | 1.57611  | 0.00085  |
| C | -1.50439 | 1.34473  | 0.00787  |
| H | -2.0155  | 5.61084  | 0.00894  |
| H | 2.40103  | 3.13589  | -0.01093 |
| N | 0.95343  | 0.47099  | -0.00334 |
| N | -2.08411 | 2.73509  | 0.01015  |
| O | -2.20344 | 0.09724  | 0.01152  |
| N | 0.50354  | -0.85475 | -0.00083 |
| H | -0.47722 | -1.04993 | 0.00381  |

|    |          |          |          |
|----|----------|----------|----------|
| C  | 1.47287  | -1.95987 | -0.00502 |
| O  | 2.68496  | -1.76724 | -0.01074 |
| C  | 0.86634  | -3.37539 | -0.00169 |
| C  | 1.70175  | -4.49234 | 0.00615  |
| C  | -0.519   | -3.54035 | -0.00626 |
| C  | 1.15177  | -5.77481 | 0.00915  |
| C  | -1.06872 | -4.82228 | -0.00377 |
| H  | -1.1774  | -2.65967 | -0.01224 |
| C  | -0.23316 | -5.93954 | 0.00359  |
| H  | -0.66686 | -6.95006 | 0.00632  |
| H  | 2.30274  | 5.59436  | -0.01123 |
| H  | -3.05932 | 2.95629  | 0.01464  |
| Cl | -2.81634 | -5.03051 | -0.01007 |
| H  | 1.7925   | -6.63174 | 0.01572  |
| O  | 3.12177  | -4.32376 | 0.01178  |
| H  | 3.54666  | -5.1846  | 0.01487  |
| H  | 0.13266  | 6.81044  | -0.00147 |
| 4b |          |          |          |
| C  | 0.22912  | 2.9193   | -0.00071 |
| C  | -1.06639 | 3.64529  | 0.00511  |
| C  | -1.05257 | 5.07991  | 0.00461  |
| C  | 0.13161  | 5.74044  | -0.00113 |
| C  | 1.39068  | 5.03488  | -0.00679 |
| C  | 1.44551  | 3.68004  | -0.00663 |
| C  | -0.0159  | 1.57611  | 0.00085  |
| C  | -1.50439 | 1.34473  | 0.00787  |
| H  | -2.0155  | 5.61084  | 0.00894  |
| H  | 2.40103  | 3.13589  | -0.01093 |
| N  | 0.95343  | 0.47099  | -0.00334 |

|    |          |          |          |
|----|----------|----------|----------|
| N  | -2.08411 | 2.73509  | 0.01015  |
| O  | -2.20344 | 0.09724  | 0.01152  |
| N  | 0.50354  | -0.85475 | -0.00083 |
| H  | -0.47722 | -1.04993 | 0.00381  |
| C  | 1.47287  | -1.95987 | -0.00502 |
| O  | 2.68496  | -1.76724 | -0.01074 |
| C  | 0.86634  | -3.37539 | -0.00169 |
| C  | 1.70175  | -4.49234 | 0.00615  |
| C  | -0.519   | -3.54035 | -0.00626 |
| C  | 1.15177  | -5.77481 | 0.00915  |
| C  | -1.06872 | -4.82228 | -0.00377 |
| H  | -1.1774  | -2.65967 | -0.01224 |
| C  | -0.23316 | -5.93954 | 0.00359  |
| H  | -0.66686 | -6.95006 | 0.00632  |
| H  | -3.05932 | 2.95629  | 0.01464  |
| Cl | -2.81634 | -5.03051 | -0.01007 |
| H  | 1.7925   | -6.63174 | 0.01572  |
| O  | 3.12177  | -4.32376 | 0.01178  |
| H  | 3.54666  | -5.1846  | 0.01487  |
| H  | 0.13266  | 6.81044  | -0.00147 |
| Cl | 2.89089  | 5.95515  | -0.01409 |
| 4c |          |          |          |
| C  | 0.22912  | 2.9193   | -0.00071 |
| C  | -1.06639 | 3.64529  | 0.00511  |
| C  | -1.05257 | 5.07991  | 0.00461  |
| C  | 0.13161  | 5.74044  | -0.00113 |
| C  | 1.39068  | 5.03488  | -0.00679 |
| C  | 1.44551  | 3.68004  | -0.00663 |
| C  | -0.0159  | 1.57611  | 0.00085  |

|    |          |          |          |
|----|----------|----------|----------|
| C  | -1.50439 | 1.34473  | 0.00787  |
| H  | -2.0155  | 5.61084  | 0.00894  |
| H  | 2.40103  | 3.13589  | -0.01093 |
| N  | 0.95343  | 0.47099  | -0.00334 |
| N  | -2.08411 | 2.73509  | 0.01015  |
| O  | -2.20344 | 0.09724  | 0.01152  |
| N  | 0.50354  | -0.85475 | -0.00083 |
| H  | -0.47722 | -1.04993 | 0.00381  |
| C  | 1.47287  | -1.95987 | -0.00502 |
| O  | 2.68496  | -1.76724 | -0.01074 |
| C  | 0.86634  | -3.37539 | -0.00169 |
| C  | 1.70175  | -4.49234 | 0.00615  |
| C  | -0.519   | -3.54035 | -0.00626 |
| C  | 1.15177  | -5.77481 | 0.00915  |
| C  | -1.06872 | -4.82228 | -0.00377 |
| H  | -1.1774  | -2.65967 | -0.01224 |
| C  | -0.23316 | -5.93954 | 0.00359  |
| H  | -0.66686 | -6.95006 | 0.00632  |
| Cl | 0.18928  | 7.49949  | -0.00194 |
| H  | 2.30274  | 5.59436  | -0.01123 |
| H  | -3.05932 | 2.95629  | 0.01464  |
| Cl | -2.81634 | -5.03051 | -0.01007 |
| H  | 1.7925   | -6.63174 | 0.01572  |
| O  | 3.12177  | -4.32376 | 0.01178  |
| H  | 3.54666  | -5.1846  | 0.01487  |
| 5a |          |          |          |
| C  | -3.58035 | 0.21616  | 0.43579  |
| O  | -3.03145 | 1.27919  | 0.79645  |

|   |          |          |          |
|---|----------|----------|----------|
| N | -2.78387 | -0.91873 | 0.22677  |
| H | -3.15366 | -1.60096 | -0.4195  |
| C | -1.3568  | -0.77436 | 0.17301  |
| C | -0.52396 | -2.07105 | 0.22393  |
| C | -0.65142 | -0.41733 | -1.16424 |
| H | -1.06852 | -0.07111 | 0.95506  |
| C | 0.44452  | -1.44927 | -0.80657 |
| H | -1.05761 | -2.90385 | -0.24331 |
| H | -0.13094 | -2.39194 | 1.19222  |
| H | -1.23046 | -0.77591 | -2.02036 |
| H | -0.34731 | 0.61974  | -1.32897 |
| O | 0.81572  | -2.36872 | -1.8128  |
| C | 1.68286  | -0.7901  | -0.18511 |
| H | 2.15639  | -0.16261 | -0.94885 |
| H | 1.36412  | -0.1319  | 0.62877  |
| C | 2.65377  | -1.84965 | 0.30821  |
| H | 2.93362  | -2.50961 | -0.51227 |
| H | 2.21638  | -2.45576 | 1.10378  |
| N | 3.93944  | -1.29029 | 0.86622  |
| C | 4.71585  | -0.5369  | -0.14279 |
| C | 6.21263  | -0.68536 | -0.2008  |
| C | 5.33553  | -1.25453 | -1.29368 |
| H | 4.30118  | 0.45214  | -0.30163 |
| H | 6.63311  | -1.43243 | 0.46818  |
| H | 5.29658  | -0.76065 | -2.25815 |
| H | 5.25651  | -2.33604 | -1.3363  |
| H | 1.23285  | -1.87457 | -2.52753 |
| C | -5.0045  | 0.08079  | 0.24552  |
| C | -5.83479 | 1.24329  | 0.31742  |

|   |           |          |          |
|---|-----------|----------|----------|
| C | -5.65683  | -1.16416 | 0.00132  |
| C | -7.22106  | 1.18307  | 0.12791  |
| H | -5.36432  | 2.20207  | 0.51412  |
| C | -7.00751  | -1.25566 | -0.18083 |
| H | -5.07984  | -2.08665 | -0.01263 |
| C | -8.0676   | 2.33529  | 0.18082  |
| C | -7.85504  | -0.08677 | -0.13656 |
| H | -7.46984  | -2.22504 | -0.35267 |
| C | -9.4343   | 2.23618  | -0.01515 |
| H | -7.61409  | 3.30398  | 0.37958  |
| C | -9.23715  | -0.14799 | -0.32842 |
| C | -10.0383  | 0.99803  | -0.27211 |
| H | -10.04637 | 3.1341   | 0.03168  |
| H | -9.69217  | -1.11722 | -0.52578 |
| H | -11.11093 | 0.92815  | -0.42452 |
| C | 7.06932   | 0.52452  | -0.36823 |
| C | 6.77639   | 1.51972  | -1.30584 |
| C | 8.18427   | 0.68536  | 0.45859  |
| C | 7.58123   | 2.6493   | -1.41142 |
| H | 5.91731   | 1.42181  | -1.96389 |
| C | 8.99113   | 1.8148   | 0.35164  |
| H | 8.42211   | -0.08052 | 1.19145  |
| C | 8.69165   | 2.80096  | -0.58375 |
| H | 7.34031   | 3.4124   | -2.14435 |
| H | 9.85374   | 1.92224  | 1.00125  |
| H | 9.31907   | 3.68209  | -0.66873 |
| C | 4.37261   | -1.47379 | 2.25892  |
| C | 4.78267   | -2.89594 | 2.50406  |
| H | 3.526     | -1.18546 | 2.92834  |

|    |          |          |          |
|----|----------|----------|----------|
| H  | 5.22419  | -0.77753 | 2.45393  |
| H  | 5.11196  | -3.03581 | 3.56225  |
| H  | 3.93084  | -3.59192 | 2.30886  |
| H  | 5.62913  | -3.18406 | 1.83431  |
| 5b |          |          |          |
| C  | -4.17606 | 0.22353  | 0.42247  |
| O  | -3.54311 | 1.23487  | 0.79362  |
| N  | -3.47141 | -0.9657  | 0.18573  |
| H  | -3.89376 | -1.59857 | -0.47858 |
| C  | -2.0372  | -0.93013 | 0.13005  |
| C  | -1.31333 | -2.29033 | 0.07299  |
| C  | -1.30754 | -0.52853 | -1.18122 |
| H  | -1.68655 | -0.31721 | 0.9615   |
| C  | -0.29861 | -1.67037 | -0.91312 |
| H  | -1.91317 | -3.03784 | -0.45435 |
| H  | -0.94668 | -2.71774 | 1.00983  |
| H  | -1.91598 | -0.77184 | -2.05715 |
| H  | -0.92057 | 0.49013  | -1.26756 |
| O  | -0.00354 | -2.53546 | -1.99028 |
| C  | 0.98966  | -1.16428 | -0.25083 |
| H  | 1.51098  | -0.51777 | -0.9657  |
| H  | 0.72547  | -0.54972 | 0.61489  |
| C  | 1.87378  | -2.33439 | 0.14653  |
| H  | 2.11229  | -2.93535 | -0.7303  |
| H  | 1.3857   | -2.97712 | 0.88168  |
| N  | 3.19289  | -1.92681 | 0.75883  |
| C  | 4.00584  | -1.09526 | -0.15525 |
| C  | 5.49006  | -1.32403 | -0.25854 |
| C  | 4.56899  | -1.6896  | -1.40098 |



|   |           |          |          |
|---|-----------|----------|----------|
| H | 3.65073   | -0.07097 | -0.17547 |
| H | 5.87172   | -2.17623 | 0.29734  |
| H | 4.5513    | -1.07306 | -2.29258 |
| H | 4.42576   | -2.74966 | -1.58217 |
| H | 0.44839   | -2.02145 | -2.66896 |
| C | -5.60817  | 0.20017  | 0.24716  |
| C | -6.34835  | 1.41987  | 0.34906  |
| C | -6.35412  | -0.98835 | -0.00965 |
| C | -7.73754  | 1.46589  | 0.17719  |
| H | -5.80578  | 2.33752  | 0.55651  |
| C | -7.70979  | -0.97603 | -0.17609 |
| H | -5.8471   | -1.9504  | -0.04631 |
| C | -8.49562  | 2.67634  | 0.26137  |
| C | -8.46728  | 0.25149  | -0.10037 |
| H | -8.24514  | -1.90515 | -0.35822 |
| C | -9.86824  | 2.68226  | 0.08247  |
| H | -7.96903  | 3.60516  | 0.47019  |
| C | -9.85242  | 0.2961   | -0.27408 |
| C | -10.56557 | 1.49694  | -0.18714 |
| H | -10.41131 | 3.62204  | 0.1529   |
| H | -10.38056 | -0.63312 | -0.48151 |
| H | -11.64224 | 1.50937  | -0.32594 |
| C | 6.4177    | -0.15726 | -0.28374 |
| C | 6.18206   | 0.96444  | -1.08348 |
| C | 7.54689   | -0.16879 | 0.53818  |
| C | 7.04964   | 2.04987  | -1.06633 |
| H | 5.31537   | 1.00806  | -1.73613 |
| C | 8.4267    | 0.9081   | 0.56593  |
| H | 7.74714   | -1.0303  | 1.16775  |

|    |         |          |          |
|----|---------|----------|----------|
| C  | 8.16658 | 2.0093   | -0.23953 |
| H  | 6.85919 | 2.91505  | -1.6905  |
| H  | 9.30094 | 0.88836  | 1.20606  |
| Cl | 9.26747 | 3.37349  | -0.21518 |
| C  | 3.62074 | -2.31307 | 2.1111   |
| C  | 3.83885 | -3.79497 | 2.19561  |
| H  | 2.83231 | -1.98773 | 2.8326   |
| H  | 4.5618  | -1.76063 | 2.35029  |
| H  | 4.16404 | -4.08891 | 3.22305  |
| H  | 2.89758 | -4.34707 | 1.95628  |
| H  | 4.62716 | -4.12004 | 1.47383  |

### 6a

|   |             |             |             |
|---|-------------|-------------|-------------|
| C | 1.03263500  | -0.90337200 | 0.83936000  |
| C | 2.41971900  | -0.92619200 | 0.83350300  |
| C | 3.12607800  | -0.06204900 | -0.00666300 |
| C | 2.43511800  | 0.81484100  | -0.84707000 |
| C | 1.04642500  | 0.81746200  | -0.85275100 |
| C | 0.34207700  | -0.03549800 | -0.00617400 |
| H | 0.48124200  | -1.55995100 | 1.50466600  |
| H | 2.96810700  | -1.59973000 | 1.48237000  |
| H | 2.98131400  | 1.48646000  | -1.50268500 |
| H | 0.50469600  | 1.48817500  | -1.50981700 |
| O | 4.47899100  | -0.11994500 | 0.03761200  |
| H | 4.85473500  | 0.51882200  | -0.57733800 |
| N | -1.08170500 | -0.01719400 | -0.00689900 |
| C | -1.85517200 | 1.08634100  | 0.34282700  |
| C | -3.26407500 | 0.70899600  | 0.22442200  |
| C | -3.45086200 | -0.55941600 | -0.18043100 |
| H | -4.05651300 | 1.40757400  | 0.45319000  |
| H | -4.38756800 | -1.07585400 | -0.34241400 |
| S | -1.97273500 | -1.40852400 | -0.45883800 |
| O | -1.37923700 | 2.16301600  | 0.68733800  |

### 6b

|   |            |             |             |
|---|------------|-------------|-------------|
| C | 1.68477700 | -0.63921100 | 1.05298200  |
| C | 3.05973200 | -0.81586600 | 1.01784600  |
| C | 3.80008500 | -0.29681200 | -0.04804300 |
| C | 3.15567300 | 0.39226800  | -1.07946900 |
| C | 1.77677000 | 0.55141200  | -1.04646800 |
| C | 1.04119100 | 0.04254100  | 0.02077000  |
| H | 1.10482400 | -1.02801100 | 1.88354700  |

|    |             |             |             |
|----|-------------|-------------|-------------|
| H  | 3.57436800  | -1.34599400 | 1.81115400  |
| H  | 3.72923900  | 0.79549200  | -1.90845400 |
| H  | 1.26727900  | 1.07628900  | -1.84703900 |
| O  | 5.13896600  | -0.49379000 | -0.02610500 |
| H  | 5.54319500  | -0.09540800 | -0.80422900 |
| N  | -0.37330000 | 0.21999800  | 0.05506900  |
| C  | -1.00754300 | 1.43024800  | 0.31089500  |
| C  | -2.45650600 | 1.21848200  | 0.25664700  |
| C  | -2.78475800 | -0.05297600 | -0.02181100 |
| H  | -3.15983900 | 2.01985800  | 0.43065600  |
| S  | -1.41928300 | -1.10576300 | -0.24783600 |
| O  | -0.40618700 | 2.47076700  | 0.54106100  |
| Cl | -4.36565900 | -0.70978400 | -0.16973500 |

### 7a

|   |             |             |             |
|---|-------------|-------------|-------------|
| C | -5.82726200 | -0.52518100 | -0.33542000 |
| C | -4.55778900 | -1.05849300 | -0.36591500 |
| C | -3.42835600 | -0.23371300 | -0.06016600 |
| C | -3.65683600 | 1.12697800  | 0.27357100  |
| C | -4.97283900 | 1.64984100  | 0.29953500  |
| C | -6.03124400 | 0.83143100  | -0.00165400 |
| H | -6.68048300 | -1.15512900 | -0.57078500 |
| C | -2.51019800 | 1.90746800  | 0.57486800  |
| H | -5.12552700 | 2.69293400  | 0.55742800  |
| H | -7.04427600 | 1.21961800  | 0.01353700  |
| C | -1.26918100 | 1.34251300  | 0.53104200  |
| C | -1.13970500 | -0.03228600 | 0.17643300  |
| H | -2.63496800 | 2.95274700  | 0.84182000  |
| H | -0.39279600 | 1.93384700  | 0.76791500  |
| N | -2.18864400 | -0.78804200 | -0.10410500 |
| C | 0.16179700  | -0.71100800 | 0.09533000  |
| H | 0.08027300  | -1.76780100 | -0.14671200 |
| C | 1.36387400  | -0.14102100 | 0.26615400  |
| H | 1.43548600  | 0.92656300  | 0.45126200  |
| C | 2.65158200  | -0.84376400 | 0.20086300  |
| C | 3.83070200  | -0.10175400 | -0.03919900 |
| C | 2.76765100  | -2.22454500 | 0.38718300  |
| C | 5.06966300  | -0.74231900 | -0.09866500 |
| C | 3.99849100  | -2.86818000 | 0.32317300  |
| H | 1.87557700  | -2.80233200 | 0.60790200  |
| C | 5.14603500  | -2.12170400 | 0.07918400  |
| H | 5.97547500  | -0.17933300 | -0.28627900 |
| H | 4.06055100  | -3.94027600 | 0.47446300  |
| H | 6.11502600  | -2.60806100 | 0.03088000  |
| O | 3.66375000  | 1.23180800  | -0.21208700 |
| C | 4.81152900  | 2.05461300  | -0.39704500 |
| C | 4.33036300  | 3.48554400  | -0.50746100 |
| H | 5.34249100  | 1.74979600  | -1.30747900 |
| H | 5.49411900  | 1.93515600  | 0.45359100  |
| H | 5.18416100  | 4.15162900  | -0.65371200 |
| H | 3.65199500  | 3.59960900  | -1.35662400 |
| H | 3.80657200  | 3.78728400  | 0.40298800  |
| O | -4.30339600 | -2.34996800 | -0.67643400 |

|   |             |             |             |
|---|-------------|-------------|-------------|
| H | -5.13567800 | -2.80118900 | -0.85415700 |
|---|-------------|-------------|-------------|

7b

|    |             |             |             |
|----|-------------|-------------|-------------|
| C  | -4.70746500 | -0.82556700 | 0.26677200  |
| C  | -3.42578600 | -1.33383000 | 0.26272500  |
| C  | -2.33846900 | -0.43771000 | 0.00134200  |
| C  | -2.59964300 | 0.93604600  | -0.24454700 |
| C  | -3.94404600 | 1.39153600  | -0.22603200 |
| C  | -4.97978400 | 0.53457300  | 0.02374400  |
| C  | -1.47442900 | 1.76071700  | -0.49951200 |
| H  | -6.00411600 | 0.88563300  | 0.03776600  |
| C  | -0.22214500 | 1.22088400  | -0.49541700 |
| C  | -0.05633600 | -0.16851200 | -0.22994000 |
| H  | -1.61712100 | 2.81598300  | -0.70110200 |
| H  | 0.63625000  | 1.84812300  | -0.70170100 |
| N  | -1.08898200 | -0.96163400 | 0.00358200  |
| C  | 1.25847400  | -0.82108000 | -0.19993100 |
| H  | 1.20384100  | -1.89856100 | -0.06781100 |
| C  | 2.44471200  | -0.20083700 | -0.28985100 |
| H  | 2.48570100  | 0.88240200  | -0.35521700 |
| C  | 3.75120500  | -0.86883600 | -0.28358000 |
| C  | 4.90322700  | -0.12659500 | 0.06326500  |
| C  | 3.91021900  | -2.21385900 | -0.63117100 |
| C  | 6.16025600  | -0.73408100 | 0.06486300  |
| C  | 5.15898200  | -2.82452500 | -0.62534800 |
| H  | 3.03848400  | -2.78557600 | -0.93374700 |
| C  | 6.27999700  | -2.07911700 | -0.27601900 |
| H  | 7.04658700  | -0.17278900 | 0.33270500  |
| H  | 5.25607900  | -3.86828600 | -0.90294700 |
| H  | 7.26270900  | -2.53955900 | -0.27155000 |
| O  | 4.69224300  | 1.16980100  | 0.39326600  |
| C  | 5.81043800  | 1.99670700  | 0.70312400  |
| C  | 5.28181600  | 3.38667400  | 0.98509500  |
| H  | 6.50903100  | 2.00683000  | -0.14272900 |
| H  | 6.33643400  | 1.59402800  | 1.57759200  |
| H  | 6.11173100  | 4.05378100  | 1.23051100  |
| H  | 4.76203400  | 3.78621200  | 0.11074200  |
| H  | 4.58794900  | 3.37125700  | 1.82921600  |
| O  | -3.12432200 | -2.62047300 | 0.48967100  |
| H  | -3.93682200 | -3.11838100 | 0.65004600  |
| Cl | -6.04476800 | -1.90727600 | 0.58530300  |
| Cl | -4.30032700 | 3.07905100  | -0.52635300 |

8a

|   |             |             |             |
|---|-------------|-------------|-------------|
| C | -6.08437800 | -0.80655800 | -0.75627600 |
| C | -5.60082000 | 0.46648400  | -1.04762200 |
| C | -4.34568000 | 0.85803500  | -0.59084400 |
| C | -3.56708000 | -0.02377900 | 0.16389500  |
| C | -4.06587100 | -1.29217800 | 0.46871800  |
| C | -5.31544300 | -1.68559700 | 0.00446300  |
| H | -7.06191800 | -1.11108400 | -1.11592300 |

|   |             |             |             |
|---|-------------|-------------|-------------|
| H | -6.20348700 | 1.15936800  | -1.62538700 |
| H | -3.99348200 | 1.86320800  | -0.80164600 |
| H | -3.46010300 | -1.96127000 | 1.07008900  |
| H | -5.69141200 | -2.67656300 | 0.23687700  |
| C | -2.21071700 | 0.33931300  | 0.69698500  |
| O | -1.76375100 | -0.18134100 | 1.71883200  |
| N | -1.51961200 | 1.26932600  | -0.00560400 |
| C | -0.17553000 | 1.66525200  | 0.37442800  |
| C | 0.89407000  | 0.68763300  | -0.11486700 |
| C | 2.28735200  | 1.12413100  | 0.32866900  |
| C | 4.65855900  | 0.93609500  | -0.00585000 |
| C | 3.36676300  | -1.04697800 | 0.24216800  |
| C | 5.75931600  | 0.10848600  | -0.65152300 |
| H | 4.67031000  | 1.94635200  | -0.42859000 |
| H | 4.86256600  | 1.02238700  | 1.07874900  |
| C | 4.50086200  | -1.82945600 | -0.40374700 |
| H | 2.42112800  | -1.53909300 | -0.00098900 |
| H | 3.48692600  | -1.07180400 | 1.34260500  |
| H | 5.62242200  | 0.10837700  | -1.74436500 |
| H | 6.74032200  | 0.53049500  | -0.42116100 |
| H | 4.32014200  | -1.90303600 | -1.48773900 |
| H | 4.55152000  | -2.83849800 | 0.01184200  |
| O | 5.75614900  | -1.22064400 | -0.16303300 |
| N | 3.35689900  | 0.32508900  | -0.25714000 |
| H | 0.00517500  | 2.66562900  | -0.02905800 |
| H | -0.14661200 | 1.73568400  | 1.46500700  |
| H | 0.64830000  | -0.30311100 | 0.27932400  |
| H | 0.86778100  | 0.62560500  | -1.20840000 |
| H | 2.44728700  | 2.16294200  | 0.01438400  |
| H | 2.34266000  | 1.11802900  | 1.43527100  |
| H | -1.83813100 | 1.51605000  | -0.92965200 |

## 8b

|   |             |             |             |
|---|-------------|-------------|-------------|
| C | -5.32211100 | -0.51381300 | -0.14297900 |
| C | -4.36146200 | -1.17647000 | 0.61179800  |
| C | -3.06975800 | -0.66300600 | 0.65758900  |
| C | -2.74135600 | 0.49816600  | -0.04496900 |
| C | -3.71975800 | 1.13222800  | -0.81240700 |
| C | -5.01643100 | 0.63828200  | -0.86058700 |
| H | -4.61387600 | -2.08258500 | 1.14966900  |
| H | -2.31810000 | -1.20201400 | 1.22519500  |
| H | -3.45363900 | 2.02134600  | -1.37268000 |
| H | -5.77814000 | 1.13754000  | -1.44789100 |
| C | -1.35924500 | 1.08907000  | -0.05034900 |
| O | -0.95269400 | 1.74363300  | -1.00963000 |
| N | -0.61086200 | 0.87463900  | 1.05479800  |
| C | 0.75852600  | 1.34644400  | 1.15712100  |
| C | 1.76116000  | 0.38162000  | 0.52294000  |
| C | 3.19104400  | 0.89329400  | 0.67372700  |
| C | 5.46062900  | 0.79902900  | -0.10453300 |
| C | 4.32945400  | -1.23275900 | 0.40253600  |
| C | 6.45504700  | 0.00806600  | -0.94050500 |
| H | 5.34592700  | 1.80136600  | -0.53069300 |

|    |             |             |             |
|----|-------------|-------------|-------------|
| H  | 5.86292400  | 0.91279300  | 0.92048800  |
| C  | 5.35481400  | -1.97686500 | -0.44054500 |
| H  | 3.37797800  | -1.76866600 | 0.34637100  |
| H  | 4.65631600  | -1.23447900 | 1.46048100  |
| H  | 6.11378500  | -0.01697200 | -1.98737400 |
| H  | 7.44190700  | 0.47531700  | -0.90448600 |
| H  | 4.97516400  | -2.07603400 | -1.46967100 |
| H  | 5.52859000  | -2.97574100 | -0.03376500 |
| O  | 6.60426900  | -1.31129200 | -0.44809600 |
| N  | 4.16383900  | 0.12898300  | -0.09739900 |
| H  | 0.81703900  | 2.32264100  | 0.66703400  |
| H  | 0.98373100  | 1.49031800  | 2.21723000  |
| H  | 1.64259800  | -0.60055900 | 0.99227100  |
| H  | 1.52799500  | 0.26965200  | -0.54090500 |
| H  | 3.23282100  | 1.92877700  | 0.31404100  |
| H  | 3.46340300  | 0.92173100  | 1.74748700  |
| H  | -1.01503400 | 0.40068200  | 1.84605900  |
| Cl | -6.95283200 | -1.14993500 | -0.20069800 |

### 8c

|   |             |             |             |
|---|-------------|-------------|-------------|
| C | -4.70136600 | 0.88029300  | 0.01067900  |
| C | -3.67278900 | 1.67360700  | -0.48826000 |
| C | -2.39976600 | 1.14382600  | -0.65013100 |
| C | -2.14362600 | -0.18521500 | -0.31207000 |
| C | -3.16899600 | -0.97081800 | 0.20825300  |
| C | -4.44571700 | -0.44804200 | 0.36253100  |
| H | -3.87382700 | 2.70755800  | -0.74180800 |
| H | -1.60922800 | 1.79155900  | -1.01302600 |
| H | -2.96154300 | -1.99558000 | 0.49259000  |
| C | -0.78733500 | -0.82500600 | -0.43883500 |
| O | -0.45718400 | -1.75339300 | 0.29674500  |
| N | 0.01734700  | -0.33255200 | -1.40481700 |
| C | 1.37148400  | -0.82238200 | -1.59622200 |
| C | 2.37641100  | -0.14338000 | -0.66505300 |
| C | 3.79024700  | -0.66664200 | -0.90237900 |
| C | 6.01439800  | -0.92655000 | -0.03466900 |
| C | 5.00624600  | 1.22925100  | 0.00045500  |
| C | 6.99446100  | -0.45805800 | 1.03000500  |
| H | 5.83086300  | -1.99910800 | 0.08911300  |
| H | 6.46849900  | -0.77531800 | -1.03282300 |
| C | 6.01464700  | 1.64897700  | 1.06001300  |
| H | 4.07818600  | 1.78382000  | 0.16423000  |
| H | 5.39225500  | 1.50470200  | -1.00010200 |
| H | 6.59605200  | -0.70399700 | 2.02687600  |
| H | 7.95979300  | -0.95431700 | 0.90613600  |
| H | 5.58252800  | 1.48153900  | 2.05915000  |
| H | 6.25586200  | 2.70940200  | 0.95624400  |
| O | 7.23045400  | 0.93491300  | 0.93301100  |
| N | 4.75143800  | -0.20551500 | 0.09186100  |
| H | 1.36819900  | -1.90214600 | -1.42152500 |
| H | 1.64190600  | -0.65327700 | -2.64178800 |
| H | 2.32372000  | 0.93825700  | -0.82683200 |
| H | 2.09051000  | -0.33633100 | 0.37399100  |

|    |             |             |             |
|----|-------------|-------------|-------------|
| H  | 3.77125300  | -1.76223800 | -0.85270600 |
| H  | 4.11660000  | -0.40347700 | -1.92806300 |
| H  | -0.33044100 | 0.37307600  | -2.03372200 |
| Cl | -6.28543500 | 1.57496200  | 0.19240200  |
| Cl | -5.70036700 | -1.47313800 | 0.99999900  |

9a

|   |          |          |          |
|---|----------|----------|----------|
| C | -6.17387 | -1.27575 | -0.0979  |
| C | -5.25917 | -1.34598 | -1.14529 |
| C | -4.06183 | -0.63924 | -1.07529 |
| C | -3.77379 | 0.14674  | 0.04375  |
| C | -4.70587 | 0.23072  | 1.0809   |
| C | -5.89536 | -0.48539 | 1.01615  |
| H | -7.10675 | -1.82727 | -0.15397 |
| H | -5.48236 | -1.94067 | -2.02483 |
| H | -3.37321 | -0.6795  | -1.91379 |
| H | -4.48198 | 0.86153  | 1.93424  |
| H | -6.60954 | -0.42511 | 1.83083  |
| C | -2.51468 | 0.95866  | 0.1674   |
| O | -2.49376 | 1.99887  | 0.82438  |
| N | -1.4227  | 0.46709  | -0.46375 |
| C | -0.14477 | 1.15343  | -0.48037 |
| C | 1.01522  | 0.17947  | -0.29602 |
| C | 2.34836  | 0.92287  | -0.29379 |
| C | 4.72585  | 0.80477  | -0.58132 |
| C | 3.66422  | -0.71936 | 0.9078   |
| C | 5.93002  | -0.12254 | -0.63083 |
| H | 4.63044  | 1.32501  | -1.54027 |
| H | 4.89186  | 1.56914  | 0.20198  |
| C | 4.89857  | -1.60584 | 0.82974  |
| H | 2.78882  | -1.35464 | 1.06768  |
| H | 3.75541  | -0.04429 | 1.78072  |
| H | 5.82149  | -0.81901 | -1.47699 |
| H | 6.84986  | 0.45083  | -0.76539 |
| H | 4.75778  | -2.35882 | 0.0381   |
| H | 5.05266  | -2.12315 | 1.77948  |
| O | 6.06805  | -0.84922 | 0.57638  |
| N | 3.50807  | 0.04006  | -0.32956 |
| H | -0.02715 | 1.70964  | -1.41982 |
| H | -0.16516 | 1.88334  | 0.33121  |
| H | 0.86299  | -0.36306 | 0.64237  |
| H | 1.02526  | -0.55972 | -1.10567 |
| H | 2.39416  | 1.5594   | -1.1854  |
| H | 2.38831  | 1.60173  | 0.58103  |
| H | -1.48219 | -0.42804 | -0.92397 |

9b

|   |          |          |          |
|---|----------|----------|----------|
| C | -6.48149 | -1.28447 | 0.04249  |
| C | -5.25829 | -1.94974 | 0.13015  |
| C | -4.06698 | -1.22474 | 0.11068  |
| C | -4.0985  | 0.16612  | 0.00232  |
| C | -5.32142 | 0.83112  | -0.0858  |
| C | -6.51303 | 0.10582  | -0.06532 |
| H | -5.23378 | -3.04577 | 0.21591  |
| H | -3.10283 | -1.74899 | 0.18041  |

|    |          |          |          |
|----|----------|----------|----------|
| H  | -5.34659 | 1.92727  | -0.17122 |
| H  | -7.47701 | 0.6303   | -0.1346  |
| C  | -2.78291 | 0.96634  | -0.01924 |
| O  | -2.76227 | 2.18912  | -0.12259 |
| N  | -1.55347 | 0.16824  | 0.09226  |
| C  | -0.24167 | 0.81406  | -0.05935 |
| C  | 1.04631  | -0.02204 | 0.05745  |
| C  | 2.42059  | 0.65453  | -0.10138 |
| C  | 4.49083  | -0.09196 | -1.27888 |
| C  | 4.52917  | 0.31172  | 1.18961  |
| C  | 5.80991  | -0.83036 | -1.17724 |
| H  | 3.88258  | -0.52308 | -2.11593 |
| H  | 4.68475  | 0.98553  | -1.52338 |
| C  | 5.8479   | -0.42737 | 1.29101  |
| H  | 3.94786  | 0.17395  | 2.13811  |
| H  | 4.72585  | 1.40982  | 1.07143  |
| H  | 5.61396  | -1.92843 | -1.05809 |
| H  | 6.391    | -0.69294 | -2.12596 |
| H  | 5.65374  | -1.50525 | 1.53358  |
| H  | 6.45585  | 0.00246  | 2.12891  |
| O  | 6.63042  | -0.33551 | -0.0035  |
| N  | 3.70857  | -0.18156 | 0.01542  |
| H  | -0.22883 | 1.28178  | -1.02163 |
| H  | -0.18363 | 1.58865  | 0.67654  |
| H  | 1.03348  | -0.48976 | 1.01973  |
| H  | 0.98828  | -0.79663 | -0.67844 |
| H  | 2.43342  | 1.12226  | -1.06366 |
| H  | 2.47862  | 1.42912  | 0.63451  |
| H  | -1.6095  | -0.81401 | 0.27125  |
| Cl | -7.98465 | -2.1996  | 0.06781  |

9c

|   |          |          |          |
|---|----------|----------|----------|
| C | -6.48149 | -1.28447 | 0.04249  |
| C | -5.25829 | -1.94974 | 0.13015  |
| C | -4.06698 | -1.22474 | 0.11068  |
| C | -4.0985  | 0.16612  | 0.00232  |
| C | -5.32142 | 0.83112  | -0.0858  |
| C | -6.51303 | 0.10582  | -0.06532 |
| H | -5.23378 | -3.04577 | 0.21591  |
| H | -3.10283 | -1.74899 | 0.18041  |
| H | -5.34659 | 1.92727  | -0.17122 |
| C | -2.78291 | 0.96634  | -0.01924 |
| O | -2.76227 | 2.18912  | -0.12259 |
| N | -1.55347 | 0.16824  | 0.09226  |
| C | -0.24167 | 0.81406  | -0.05935 |
| C | 1.04631  | -0.02204 | 0.05745  |
| C | 2.42059  | 0.65453  | -0.10138 |
| C | 4.49083  | -0.09196 | -1.27888 |
| C | 4.52917  | 0.31172  | 1.18961  |
| C | 5.80991  | -0.83036 | -1.17724 |
| H | 3.88258  | -0.52308 | -2.11593 |
| H | 4.68475  | 0.98553  | -1.52338 |
| C | 5.8479   | -0.42737 | 1.29101  |
| H | 3.94786  | 0.17395  | 2.13811  |
| H | 4.72585  | 1.40982  | 1.07143  |
| H | 5.61396  | -1.92843 | -1.05809 |



|    |          |          |          |
|----|----------|----------|----------|
| H  | 6.391    | -0.69294 | -2.12596 |
| H  | 5.65374  | -1.50525 | 1.53358  |
| H  | 6.45585  | 0.00246  | 2.12891  |
| O  | 6.63042  | -0.33551 | -0.0035  |
| N  | 3.70857  | -0.18156 | 0.01542  |
| H  | -0.22883 | 1.28178  | -1.02163 |
| H  | -0.18363 | 1.58865  | 0.67654  |
| H  | 1.03348  | -0.48976 | 1.01973  |
| H  | 0.98828  | -0.79663 | -0.67844 |
| H  | 2.43342  | 1.12226  | -1.06366 |
| H  | 2.47862  | 1.42912  | 0.63451  |
| H  | -1.6095  | -0.81401 | 0.27125  |
| Cl | -7.98465 | -2.1996  | 0.06781  |
| Cl | -8.05595 | 0.94529  | -0.1762  |

### 10a

|    |             |             |             |
|----|-------------|-------------|-------------|
| C  | 3.77814600  | 1.07921400  | -0.00000800 |
| C  | 2.72383000  | 1.97805600  | 0.00035500  |
| C  | 1.40141700  | 1.52902500  | 0.00051200  |
| C  | 1.12062600  | 0.15067500  | 0.00024200  |
| C  | 2.19718000  | -0.74159200 | -0.00012700 |
| C  | 3.50169000  | -0.28394200 | -0.00023800 |
| H  | 4.80081100  | 1.43767700  | -0.00011700 |
| H  | 2.92646800  | 3.04452200  | 0.00052300  |
| H  | 1.97399100  | -1.80147700 | -0.00030600 |
| C  | -0.24367700 | -0.49996100 | 0.00027800  |
| O  | -0.33225100 | -1.72500000 | 0.00012600  |
| C  | -2.68622000 | -0.00193800 | 0.00012600  |
| C  | -3.17556600 | -1.31289600 | 0.00120300  |
| C  | -3.59078600 | 1.06880400  | -0.00125500 |
| C  | -4.55172100 | -1.53039000 | 0.00088800  |
| H  | -2.48377300 | -2.14181200 | 0.00223500  |
| C  | -4.95895700 | 0.83530900  | -0.00153600 |
| H  | -3.21648600 | 2.08873700  | -0.00214500 |
| C  | -5.45036700 | -0.46881800 | -0.00046900 |
| H  | -4.91968600 | -2.55171200 | 0.00173500  |
| H  | -5.64243100 | 1.67823700  | -0.00260600 |
| H  | -6.51942800 | -0.65285700 | -0.00070400 |
| H  | -1.11125200 | 1.32436300  | 0.00046100  |
| O  | 0.37371700  | 2.41401900  | 0.00088600  |
| H  | 0.69522900  | 3.32156700  | 0.00156400  |
| Cl | 4.82368200  | -1.43537400 | -0.00067000 |
| N  | -1.31876100 | 0.33324000  | 0.00040500  |

### 10b

|   |            |             |             |
|---|------------|-------------|-------------|
| C | 4.62168400 | 0.97079400  | -0.00006100 |
| C | 3.60863000 | 1.91581600  | 0.00014000  |
| C | 2.26746100 | 1.52667600  | 0.00025900  |
| C | 1.92659500 | 0.16202200  | 0.00013700  |
| C | 2.96199500 | -0.77793400 | -0.00005400 |

|    |             |             |             |
|----|-------------|-------------|-------------|
| C  | 4.28544000  | -0.37902100 | -0.00014300 |
| H  | 5.65916900  | 1.28380300  | -0.00015400 |
| H  | 3.85897200  | 2.97183100  | 0.00020900  |
| H  | 2.69116900  | -1.82666900 | -0.00013400 |
| C  | 0.53640000  | -0.42682100 | 0.00014100  |
| O  | 0.39083100  | -1.64572100 | 0.00001100  |
| C  | -1.87900300 | 0.17100800  | 0.00013700  |
| C  | -2.41669000 | -1.12086800 | 0.00072800  |
| C  | -2.74650400 | 1.27154300  | -0.00060300 |
| C  | -3.79689400 | -1.29873200 | 0.00061100  |
| H  | -1.75860300 | -1.97638800 | 0.00122900  |
| C  | -4.12187400 | 1.09492300  | -0.00069800 |
| H  | -2.34266000 | 2.27932400  | -0.00114000 |
| C  | -4.63892500 | -0.19579700 | -0.00008100 |
| H  | -4.20897500 | -2.30139500 | 0.00107700  |
| H  | -4.78212000 | 1.95429900  | -0.00126100 |
| H  | -0.25367700 | 1.43527200  | 0.00034600  |
| O  | 1.27948400  | 2.45553700  | 0.00048600  |
| H  | 1.63923100  | 3.34885500  | 0.00057100  |
| Cl | 5.55490000  | -1.58745300 | -0.00036300 |
| Cl | -6.37801900 | -0.43041900 | -0.00020400 |
| N  | -0.50312800 | 0.45353100  | 0.00026400  |

### 10c

|    |             |             |             |
|----|-------------|-------------|-------------|
| C  | 5.05841100  | 1.14165200  | 0.00010600  |
| C  | 3.97034500  | 1.99915300  | 0.00077100  |
| C  | 2.66681100  | 1.49824100  | 0.00090400  |
| C  | 2.44126400  | 0.10985900  | 0.00032500  |
| C  | 3.55137100  | -0.74074400 | -0.00033900 |
| C  | 4.83648400  | -0.23179100 | -0.00044200 |
| H  | 6.06628700  | 1.53972600  | 0.00001400  |
| H  | 4.13110000  | 3.07269300  | 0.00120000  |
| H  | 3.37110900  | -1.80872700 | -0.00076600 |
| C  | 1.10479200  | -0.59001100 | 0.00031400  |
| O  | 1.05514500  | -1.81547900 | -0.00006300 |
| C  | -1.34814300 | -0.19006800 | 0.00053900  |
| C  | -1.78048400 | -1.52084000 | 0.00129400  |
| C  | -2.29961500 | 0.83616000  | -0.00035600 |
| C  | -3.14002600 | -1.80205900 | 0.00112800  |
| H  | -1.05825800 | -2.32241300 | 0.00198100  |
| C  | -3.65513400 | 0.54217700  | -0.00048400 |
| H  | -1.98663000 | 1.87454500  | -0.00098500 |
| C  | -4.08747100 | -0.78500000 | 0.00024800  |
| H  | -3.47240300 | -2.83373800 | 0.00171600  |
| H  | 0.16674000  | 1.20457400  | 0.00093600  |
| O  | 1.60392100  | 2.33990000  | 0.00157600  |
| H  | 1.88578200  | 3.26049700  | 0.00219600  |
| Cl | 6.20272100  | -1.32948800 | -0.00127800 |
| N  | -0.00410800 | 0.20571500  | 0.00071000  |
| Cl | -5.78107900 | -1.19529200 | 0.00008900  |
| Cl | -4.78982600 | 1.86460900  | -0.00160100 |

### 11a

|   |             |             |             |
|---|-------------|-------------|-------------|
| C | -0.41581800 | 0.81994400  | -0.00008600 |
| C | 0.98541300  | 0.95344300  | -0.00003400 |
| C | 1.46176800  | 2.25770900  | -0.00001100 |
| C | 0.57972700  | 3.33923000  | -0.00003200 |
| C | -0.77659200 | 3.06805600  | -0.00007000 |
| N | -1.27452300 | 1.82322400  | -0.00010300 |
| H | 2.53348800  | 2.43490800  | 0.00002200  |
| H | 0.94109000  | 4.36069400  | -0.00001700 |
| H | -1.50762000 | 3.87222100  | -0.00009100 |
| O | -0.90344000 | -0.45381400 | -0.00013000 |
| C | -2.27556400 | -0.64891600 | -0.00004300 |
| C | -2.94069100 | -0.78946500 | 1.21136600  |
| C | -2.94076500 | -0.78980600 | -1.21137300 |
| C | -4.30375500 | -1.07361400 | 1.20611500  |
| H | -2.39156600 | -0.67719400 | 2.13991000  |
| C | -4.30382800 | -1.07395800 | -1.20596100 |
| H | -2.39169000 | -0.67779200 | -2.13997700 |
| C | -4.98714600 | -1.21550600 | 0.00011800  |
| H | -4.83007200 | -1.18697600 | 2.14821100  |
| H | -4.83020300 | -1.18758400 | -2.14799300 |
| H | -6.04904600 | -1.43787400 | 0.00018200  |
| C | 1.90921400  | -0.24354100 | -0.00000400 |
| C | 2.79386700  | -0.29334500 | -1.25771000 |
| C | 2.79381200  | -0.29331800 | 1.25774400  |
| H | 1.28926000  | -1.14624900 | -0.00000700 |
| C | 3.72777000  | -1.50018600 | -1.20655900 |
| H | 2.16769200  | -0.34092300 | -2.15478200 |
| H | 3.39689600  | 0.62032000  | -1.32333100 |
| C | 3.72772000  | -1.50015700 | 1.20665800  |
| H | 2.16759200  | -0.34088400 | 2.15478600  |
| H | 3.39682900  | 0.62035300  | 1.32337900  |
| H | 3.11753500  | -2.42220900 | -1.25017900 |
| H | 4.38650100  | -1.50384400 | -2.08038400 |
| H | 3.11748500  | -2.42217900 | 1.25027800  |
| H | 4.38641500  | -1.50379000 | 2.08051100  |
| N | 4.54852700  | -1.43913900 | 0.00006600  |
| H | 5.19811300  | -2.21849700 | 0.00008800  |

11b

|   |             |             |             |
|---|-------------|-------------|-------------|
| C | 0.11453700  | 1.03592400  | -0.20615000 |
| C | -1.28655300 | 1.14928300  | -0.12276600 |
| C | -1.75571800 | 2.40065200  | 0.24926800  |
| C | -0.86440300 | 3.44435300  | 0.51406000  |
| C | 0.48904900  | 3.19501900  | 0.39165700  |
| N | 0.98039000  | 1.99888800  | 0.03076400  |
| H | -2.82308300 | 2.57373000  | 0.33452300  |
| H | -1.22175100 | 4.42495300  | 0.80514800  |
| H | 1.22286500  | 3.97288900  | 0.58380400  |
| O | 0.59197500  | -0.19130800 | -0.58217300 |
| C | 1.95191600  | -0.39150500 | -0.61551500 |
| C | 2.62011300  | -0.31830200 | -1.83091100 |
| C | 2.64853300  | -0.75744700 | 0.53625700  |
| C | 3.97937200  | -0.60504200 | -1.89636800 |
| H | 2.05817200  | -0.03701400 | -2.71455300 |

|    |             |             |             |
|----|-------------|-------------|-------------|
| C  | 4.00773200  | -1.04300300 | 0.47647900  |
| C  | 4.67228100  | -0.96474900 | -0.74375000 |
| H  | 4.49496100  | -0.54627500 | -2.84842400 |
| H  | 4.53568000  | -1.32556200 | 1.38004000  |
| H  | 5.73228100  | -1.18837700 | -0.78935000 |
| C  | -2.16732600 | -0.04581200 | -0.40738800 |
| C  | -2.14622600 | -1.05383700 | 0.75866800  |
| C  | -3.62121900 | 0.30387100  | -0.74544600 |
| H  | -1.74193700 | -0.55786200 | -1.28123700 |
| C  | -2.99993700 | -2.27345600 | 0.42025700  |
| H  | -1.11893700 | -1.36386500 | 0.96971400  |
| H  | -2.54347400 | -0.56825200 | 1.65823900  |
| C  | -4.41010700 | -0.97036600 | -1.04143000 |
| H  | -3.66385100 | 0.98155800  | -1.60491600 |
| H  | -4.09613600 | 0.80962600  | 0.10367900  |
| H  | -2.52855700 | -2.80574300 | -0.42755800 |
| H  | -3.02128600 | -2.96564300 | 1.26758100  |
| H  | -3.99007200 | -1.44469600 | -1.94838400 |
| H  | -5.45450700 | -0.72449700 | -1.25577200 |
| N  | -4.36653800 | -1.85687200 | 0.11826800  |
| H  | -4.93208200 | -2.67805300 | -0.06921200 |
| Cl | 1.80392300  | -0.86200400 | 2.06054700  |

11c

|   |             |             |             |
|---|-------------|-------------|-------------|
| C | 0.44255100  | 1.10873000  | 0.09151900  |
| C | 1.81988700  | 1.00754700  | -0.16270600 |
| C | 2.37542500  | 2.08348300  | -0.84400700 |
| C | 1.58777700  | 3.17035800  | -1.22471100 |
| C | 0.24140200  | 3.14053900  | -0.90756700 |
| N | -0.33014600 | 2.11906900  | -0.25393600 |
| H | 3.43430300  | 2.07414900  | -1.08470800 |
| H | 2.01277400  | 4.01450700  | -1.75421500 |
| H | -0.41799500 | 3.95901600  | -1.18279900 |
| O | -0.13153200 | 0.05882400  | 0.76308400  |
| C | -1.49062400 | 0.06260000  | 0.94829900  |
| C | -2.01293900 | 0.51074600  | 2.15268100  |
| C | -2.32729900 | -0.46720700 | -0.03877000 |
| C | -3.38119000 | 0.43569800  | 2.38099400  |
| H | -1.33365700 | 0.91110500  | 2.89601700  |
| C | -3.70073800 | -0.53598500 | 0.20464500  |
| C | -4.22861200 | -0.08477200 | 1.41060400  |
| H | -3.79412000 | 0.78564200  | 3.31995500  |
| H | -5.29643600 | -0.14928100 | 1.58110200  |
| C | 2.62671800  | -0.20591300 | 0.23865800  |
| C | 3.00436500  | -1.05659100 | -0.98724300 |
| C | 3.89282300  | 0.15294100  | 1.03255900  |
| H | 2.00054000  | -0.82756900 | 0.88741900  |
| C | 3.83447200  | -2.26669000 | -0.56620100 |
| H | 2.09819500  | -1.38501600 | -1.50712200 |
| H | 3.58714400  | -0.44604500 | -1.68775800 |
| C | 4.67846600  | -1.11076300 | 1.37607700  |
| H | 3.62368600  | 0.68846600  | 1.94880100  |
| H | 4.53590800  | 0.81274000  | 0.43859100  |
| H | 3.20067400  | -2.93120200 | 0.05101400  |
| H | 4.14263800  | -2.83636100 | -1.44820400 |
| H | 4.06922300  | -1.73180200 | 2.05974100  |

|    |             |             |             |
|----|-------------|-------------|-------------|
| H  | 5.59933900  | -0.84903600 | 1.90577800  |
| N  | 5.02802200  | -1.82290100 | 0.14950800  |
| H  | 5.59537200  | -2.63064800 | 0.38367700  |
| Cl | -1.63093900 | -1.02561800 | -1.52609400 |
| Cl | -4.78467200 | -1.19030900 | -0.99213900 |

12a

|   |             |             |             |
|---|-------------|-------------|-------------|
| C | -2.99218700 | -1.11605300 | 0.28319400  |
| C | -4.21342100 | -0.45885300 | -0.00412900 |
| C | -5.45260200 | -1.10744000 | 0.11651100  |
| C | -5.44048500 | -2.42185200 | 0.53381700  |
| C | -4.23135400 | -3.09343100 | 0.83148600  |
| C | -3.01393800 | -2.45883200 | 0.70884100  |
| C | -1.95517600 | -0.14968800 | 0.08195400  |
| C | -2.56950000 | 1.03624900  | -0.30070300 |
| H | -6.37890100 | -0.59002400 | -0.10813500 |
| H | -4.26883900 | -4.12680600 | 1.15998500  |
| H | -2.08699600 | -2.97725400 | 0.92103500  |
| H | -4.58978800 | 1.54190700  | -0.62171800 |
| N | -3.93170600 | 0.82392200  | -0.36340200 |
| N | -0.57850900 | -0.34032900 | 0.24331000  |
| H | -0.04766800 | 0.49180900  | 0.45503400  |
| C | 0.13781100  | -1.39723800 | -0.26144200 |
| O | -0.38107900 | -2.34770500 | -0.83185200 |
| C | 1.61885800  | -1.28452800 | -0.08206000 |
| C | 2.41988500  | -2.04649800 | -0.93238000 |
| C | 2.20505700  | -0.44998200 | 0.87355000  |
| C | 3.80022200  | -1.94879200 | -0.83640800 |
| H | 1.95570200  | -2.69908600 | -1.66370200 |
| C | 3.59117500  | -0.35359800 | 0.96536600  |
| H | 1.60100100  | 0.11309800  | 1.57819000  |
| C | 4.39840800  | -1.10290100 | 0.10403300  |
| O | 4.23026700  | 0.43395900  | 1.86626700  |
| H | 3.58185100  | 0.90425400  | 2.40025900  |
| O | 5.74505000  | -1.00313000 | 0.19777000  |
| H | 6.12823600  | -1.59045600 | -0.46683700 |
| O | 4.68171400  | -2.63113700 | -1.61720300 |
| H | 4.21554300  | -3.19041200 | -2.24646300 |
| C | -2.04152700 | 2.33597300  | -0.72211300 |
| O | -2.72624400 | 3.08948600  | -1.40485300 |
| C | -0.66081400 | 2.72186700  | -0.29309100 |
| C | -0.29085800 | 2.64270000  | 1.05470600  |
| C | 0.25244300  | 3.19335700  | -1.23773500 |
| C | 0.99228000  | 3.01392200  | 1.44748300  |
| H | -1.00901200 | 2.29578200  | 1.79261000  |
| C | 1.54127600  | 3.53871800  | -0.84461700 |
| H | -0.04484900 | 3.26691200  | -2.27860800 |
| C | 1.91275100  | 3.44736700  | 0.49553100  |
| H | 1.27094500  | 2.96048700  | 2.49471600  |
| H | 2.25778500  | 3.87942500  | -1.58419700 |
| H | 2.91972100  | 3.71433200  | 0.79844100  |
| H | -6.38070600 | -2.95370100 | 0.63825000  |

12b

|    |             |             |             |
|----|-------------|-------------|-------------|
| C  | -2.59639500 | -0.42050600 | 0.13619800  |
| C  | -3.67239400 | 0.46170000  | -0.12709600 |
| C  | -5.01244900 | 0.05219000  | -0.05591300 |
| C  | -5.22870500 | -1.26213700 | 0.29107200  |
| C  | -4.18333000 | -2.17024300 | 0.56601400  |
| C  | -2.87197700 | -1.75465200 | 0.48753300  |
| C  | -1.39713300 | 0.34991000  | -0.00516400 |
| C  | -1.78155100 | 1.64373000  | -0.33135700 |
| H  | -5.82857200 | 0.73419500  | -0.26076200 |
| H  | -4.42158600 | -3.19275200 | 0.83352000  |
| H  | -2.06435300 | -2.44940800 | 0.67927400  |
| H  | -3.67041700 | 2.52303600  | -0.64785200 |
| N  | -3.15902800 | 1.68638500  | -0.41454700 |
| N  | -0.08250300 | -0.09325500 | 0.16445000  |
| H  | 0.58953400  | 0.61950100  | 0.41001100  |
| C  | 0.43762500  | -1.25520700 | -0.35235000 |
| O  | -0.23316300 | -2.07689400 | -0.96251800 |
| C  | 1.90612400  | -1.42413500 | -0.12898600 |
| C  | 2.59572700  | -2.25478100 | -1.01211300 |
| C  | 2.58764300  | -0.77724700 | 0.90539400  |
| C  | 3.96689200  | -2.40985400 | -0.86805200 |
| H  | 2.05725700  | -2.76143100 | -1.80581200 |
| C  | 3.96354500  | -0.93730500 | 1.04682100  |
| H  | 2.05879800  | -0.17124500 | 1.63443100  |
| C  | 4.66321600  | -1.75321000 | 0.15293700  |
| O  | 4.69081300  | -0.34557100 | 2.02675300  |
| H  | 4.11353400  | 0.19667200  | 2.57392300  |
| O  | 6.00116700  | -1.90151200 | 0.29365700  |
| H  | 6.30341000  | -2.49794700 | -0.40386200 |
| O  | 4.74927100  | -3.17903600 | -1.67314100 |
| H  | 4.22309700  | -3.59269600 | -2.36445100 |
| C  | -1.02682800 | 2.85011300  | -0.68579500 |
| O  | -1.56643500 | 3.74275300  | -1.32896400 |
| C  | 0.39667100  | 2.96759600  | -0.24428800 |
| C  | 0.74632100  | 2.75031400  | 1.09355300  |
| C  | 1.37578600  | 3.33607600  | -1.16858500 |
| C  | 2.07290300  | 2.88181300  | 1.49521000  |
| H  | -0.01952300 | 2.48769000  | 1.81823700  |
| C  | 2.70325700  | 3.44232900  | -0.76744900 |
| H  | 1.09547100  | 3.51722100  | -2.20087400 |
| C  | 3.05291400  | 3.21296800  | 0.56200700  |
| H  | 2.33816200  | 2.72324800  | 2.53516300  |
| H  | 3.46588700  | 3.70507600  | -1.49250700 |
| H  | 4.08906700  | 3.29745600  | 0.87204100  |
| C1 | -6.87996700 | -1.84618900 | 0.39919800  |

12c

|   |            |             |             |
|---|------------|-------------|-------------|
| C | 2.97254600 | -0.29641100 | -0.19878700 |
| C | 3.95047800 | 0.66845700  | 0.14230200  |
| C | 5.32579200 | 0.40826100  | 0.04528200  |
| C | 5.67648400 | -0.84312300 | -0.40846500 |
| C | 4.73040600 | -1.82862500 | -0.76605000 |
| C | 3.38353900 | -1.56028700 | -0.65996600 |
| C | 1.69957100 | 0.32567100  | 0.00331900  |
| C | 1.94602400 | 1.62077600  | 0.44021300  |

|    |             |             |             |
|----|-------------|-------------|-------------|
| H  | 6.06691100  | 1.15132300  | 0.31274800  |
| H  | 5.07496100  | -2.79270000 | -1.12070100 |
| H  | 2.65133400  | -2.31506000 | -0.91721600 |
| H  | 3.73276600  | 2.66643500  | 0.83564200  |
| N  | 3.31128700  | 1.80348100  | 0.52972000  |
| N  | 0.44127900  | -0.25264000 | -0.19486100 |
| H  | -0.30684800 | 0.38801800  | -0.41416600 |
| C  | 0.05872900  | -1.47604200 | 0.30207700  |
| O  | 0.83230200  | -2.23502000 | 0.86965300  |
| C  | -1.39027200 | -1.79868200 | 0.12286600  |
| C  | -1.93169000 | -2.74784700 | 0.98978200  |
| C  | -2.19573500 | -1.18655600 | -0.84212000 |
| C  | -3.27952700 | -3.06173400 | 0.89987200  |
| H  | -1.29599600 | -3.22281000 | 1.72895900  |
| C  | -3.54874300 | -1.50672000 | -0.92974500 |
| H  | -1.78222200 | -0.48591200 | -1.56156600 |
| C  | -4.09956100 | -2.44453500 | -0.05054700 |
| O  | -4.39373900 | -0.96648100 | -1.84271200 |
| H  | -3.92671900 | -0.31102600 | -2.37064900 |
| O  | -5.41571900 | -2.74656500 | -0.13960000 |
| H  | -5.60865400 | -3.41146500 | 0.53435000  |
| O  | -3.92234000 | -3.95830900 | 1.69641700  |
| H  | -3.31057200 | -4.35712600 | 2.32299100  |
| C  | 1.06779700  | 2.69871900  | 0.90173600  |
| O  | 1.50552500  | 3.58779000  | 1.62124600  |
| C  | -0.36565000 | 2.68712000  | 0.47439100  |
| C  | -0.70300500 | 2.55851100  | -0.87649400 |
| C  | -1.37193800 | 2.83581500  | 1.42885300  |
| C  | -2.03662400 | 2.55190200  | -1.27063600 |
| H  | 0.07649200  | 2.46791900  | -1.62739600 |
| C  | -2.70849000 | 2.80636600  | 1.04976800  |
| H  | -1.10971900 | 2.95303300  | 2.47455500  |
| C  | -3.02460600 | 2.65861400  | -0.29706300 |
| H  | -2.30156800 | 2.45730400  | -2.31710700 |
| H  | -3.49394900 | 2.89324600  | 1.79102300  |
| Cl | 7.37892200  | -1.24206000 | -0.55263900 |
| Cl | -4.70336700 | 2.60639500  | -0.78024600 |
